# Supplementary material for: Intramolecular effects on the kinetics of unimolecular reactions of β-HOROO˙ and HOQ˙OOH radicals
Source: Royal Society of Chemistry journal article supplement (doi:10.1039/c6cp00111d), 2016-01-01
Supplement: c6cp00111d1.pdf [file c6cp00111d1.pdf]

**Electronic Supplementary Information for:**

**INTRAMOLECULAR EFFECTS ON THE KINETICS OF UNIMOLECULAR  
REACTIONS OF  $\beta$ -HOROO• AND HOQ•OOH RADICALS**

**Content**

|                                                                                                                                                                                       |    |
|---------------------------------------------------------------------------------------------------------------------------------------------------------------------------------------|----|
| S1) Optimized geometries (Cartesian coordinates), electronic energies and ZPE (in hartree) at the m06/6-311+g(3df,2p) level of theory of the conformers of species from table 1 ..... | 1  |
| 1a) 2-C <sub>4</sub> H <sub>9</sub> OH .....                                                                                                                                          | 1  |
| 1b) C <sub>2</sub> H <sub>4</sub> (OH)OO• .....                                                                                                                                       | 4  |
| S2) Structures of the HOQ•OOH radicals corresponding to internal H-transfers of radicals from table 3 .....                                                                           | 6  |
| 2a) Group 1 .....                                                                                                                                                                     | 6  |
| 2b) Group 2 .....                                                                                                                                                                     | 7  |
| S3) Modified Arrhenius Fits of the unimolecular reactions of $\beta$ -HOROO• and HOQ•OOH radicals. Units: A (s <sup>-1</sup> ) and E (cal mol <sup>-1</sup> ) .....                   | 8  |
| 3a) For 1,5 H-shift of $\beta$ -HOROO• radicals from <b>Table 4</b> .....                                                                                                             | 8  |
| 3b) For 1,6 H-shift of $\beta$ -HOROO• radicals from <b>Table 5</b> .....                                                                                                             | 9  |
| 3c) For 1,4 H-shift of $\beta$ -HOROO• radicals from <b>Table 7</b> .....                                                                                                             | 10 |
| 3d) For HO <sub>2</sub> • elimination from $\beta$ -HOROO• radicals from <b>Table 8</b> .....                                                                                         | 11 |
| 3e) For cyclic ether formation from $\beta$ -, $\gamma$ -, and $\delta$ -HOQ•OOH radicals from <b>Table 9</b> - Group 1 .....                                                         | 12 |
| 3f) For cyclic ether formation from $\beta$ -, $\gamma$ -, and $\delta$ -HOQ•OOH radicals from <b>Table 10</b> - Group 2 .....                                                        | 13 |
| 3g) For $\beta$ -scission of $\beta$ -HOQ•OOH radicals from <b>Table 11</b> .....                                                                                                     | 14 |
| 3h) For substitution of H-atoms by methyl groups in the cyclic part of transition states involved in the 1,5 H-shift of $\beta$ -HOROO• radicals from <b>Table 12</b> - Group 1 ..... | 15 |
| 3i) For substitution of H-atoms by methyl groups in the cyclic part of transition states involved in the 1,5 H-shift of $\beta$ -HOROO• radicals from <b>Table 13</b> - Group 2 ..... | 16 |
| 3j) For Waddington mechanism of $\beta$ -HOROO• radicals from <b>Table 15</b> .....                                                                                                   | 17 |
| S4) Internal rotation potentials for the R12 radical [(CH <sub>3</sub> ) <sub>2</sub> -C(OO•)-C(OH)-CH(CH <sub>3</sub> ) <sub>2</sub> ] calculated at B3LYP/6-311G(d,p) level .....   | 18 |
| S5) Modified Arrhenius Fits of the unimolecular reactions of $\beta$ -HOROO• and HOQ•OOH radicals related to reference TS .....                                                       | 19 |
| S6) Second order perturbation theory analysis of the Fock matrix in NBO basis .....                                                                                                   | 29 |

**S1) Optimized geometries (Cartesian coordinates), electronic energies and ZPE (in hartree) at the m06/6-311+g(3df,2p) level of theory of the conformers of species from table 1**

1a) 2-C<sub>4</sub>H<sub>9</sub>OH

| Structure 1                            |           |           |           | Structure 3                            |           |           |           |
|----------------------------------------|-----------|-----------|-----------|----------------------------------------|-----------|-----------|-----------|
| C                                      | -2.044663 | -0.029036 | 0.109229  | C                                      | -2.033342 | -0.069012 | 0.085734  |
| H                                      | -2.170851 | -0.003190 | 1.195045  | H                                      | -2.154554 | 0.053862  | 1.166052  |
| H                                      | -2.092534 | 0.998100  | -0.252836 | H                                      | -2.138015 | 0.915510  | -0.377972 |
| H                                      | -2.891392 | -0.574901 | -0.309170 | H                                      | -2.869094 | -0.671789 | -0.271234 |
| C                                      | -0.727375 | -0.674539 | -0.265990 | C                                      | -0.700117 | -0.708350 | -0.244698 |
| H                                      | -0.704251 | -1.716754 | 0.069835  | H                                      | -0.673202 | -1.731983 | 0.144770  |
| H                                      | -0.605375 | -0.692363 | -1.355459 | H                                      | -0.568553 | -0.779298 | -1.330632 |
| C                                      | 0.472036  | 0.034432  | 0.322282  | C                                      | 0.487547  | 0.044436  | 0.327740  |
| H                                      | 0.343134  | 0.080478  | 1.417638  | H                                      | 0.370873  | 0.090364  | 1.424579  |
| C                                      | 1.764125  | -0.682128 | 0.002712  | C                                      | 1.791865  | -0.632954 | -0.002933 |
| H                                      | 1.892978  | -0.756895 | -1.079887 | H                                      | 1.920242  | -0.681618 | -1.087033 |
| H                                      | 2.626289  | -0.148786 | 0.411884  | H                                      | 2.632902  | -0.078207 | 0.413281  |
| H                                      | 1.767594  | -1.689896 | 0.423481  | H                                      | 1.813148  | -1.649208 | 0.394106  |
| O                                      | 0.475622  | 1.349213  | -0.206316 | O                                      | 0.575375  | 1.359757  | -0.190141 |
| H                                      | 1.244701  | 1.818121  | 0.120594  | H                                      | -0.212469 | 1.849592  | 0.050152  |
| $E_{0K} = -233.5876321$ ZPE = 0.135765 |           |           |           | $E_{0K} = -233.5875315$ ZPE = 0.135853 |           |           |           |
| Structure 2                            |           |           |           | Structure 4                            |           |           |           |
| C                                      | 2.045366  | -0.048169 | -0.106317 | C                                      | 2.026933  | 0.070537  | 0.111170  |
| H                                      | 2.188821  | -0.095703 | -1.188902 | H                                      | 2.066005  | 1.079410  | -0.304486 |
| H                                      | 2.086155  | 1.002926  | 0.181640  | H                                      | 2.113693  | 0.158227  | 1.197853  |
| H                                      | 2.886396  | -0.561197 | 0.362034  | H                                      | 2.910139  | -0.460210 | -0.245658 |
| C                                      | 0.721232  | -0.667695 | 0.286629  | C                                      | 0.756128  | -0.654880 | -0.280399 |
| H                                      | 0.692727  | -1.723660 | -0.004634 | H                                      | 0.634029  | -0.663222 | -1.369636 |
| H                                      | 0.598459  | -0.652125 | 1.378819  | H                                      | 0.805041  | -1.702260 | 0.030899  |
| C                                      | -0.473100 | 0.036273  | -0.332065 | C                                      | -0.494379 | -0.056219 | 0.325637  |
| H                                      | -0.333824 | 0.070025  | -1.420227 | H                                      | -0.380396 | -0.058663 | 1.423583  |
| C                                      | -1.770997 | -0.670275 | -0.013751 | C                                      | -0.755701 | 1.360162  | -0.136129 |
| H                                      | -1.920125 | -0.719857 | 1.070456  | H                                      | -0.813151 | 1.394945  | -1.227414 |
| H                                      | -2.618013 | -0.139905 | -0.449836 | H                                      | -1.700210 | 1.735397  | 0.267033  |
| H                                      | -1.768758 | -1.694178 | -0.393109 | H                                      | 0.030776  | 2.041239  | 0.193733  |
| O                                      | -0.528539 | 1.397121  | 0.057353  | O                                      | -1.559661 | -0.912662 | -0.044315 |
| H                                      | -0.718534 | 1.435902  | 0.997969  | H                                      | -2.386527 | -0.541167 | 0.266939  |
| $E_{0K} = -233.5871333$ ZPE = 0.135597 |           |           |           | $E_{0K} = -233.5871378$ ZPE = 0.135994 |           |           |           |

| Structure 5                              |           |           |           |
|------------------------------------------|-----------|-----------|-----------|
| C                                        | -2.027631 | 0.059094  | -0.090992 |
| H                                        | -2.071610 | 1.056076  | 0.351234  |
| H                                        | -2.118662 | 0.174929  | -1.174650 |
| H                                        | -2.905104 | -0.488488 | 0.254661  |
| C                                        | -0.745985 | -0.665046 | 0.270321  |
| H                                        | -0.621375 | -0.688564 | 1.362056  |
| H                                        | -0.793542 | -1.707642 | -0.057077 |
| C                                        | 0.500320  | -0.049046 | -0.339464 |
| H                                        | 0.391887  | -0.054346 | -1.431596 |
| C                                        | 0.745757  | 1.369595  | 0.125518  |
| H                                        | 0.809069  | 1.405405  | 1.219116  |
| H                                        | 1.684323  | 1.744960  | -0.283272 |
| H                                        | -0.054993 | 2.043845  | -0.183058 |
| O                                        | 1.631776  | -0.861903 | -0.088482 |
| H                                        | 1.791025  | -0.878537 | 0.858137  |
| $E_{0K} = -233.5866582$ $ZPE = 0.135729$ |           |           |           |

| Structure 7                              |           |           |           |
|------------------------------------------|-----------|-----------|-----------|
| C                                        | 1.742395  | 0.137083  | -0.507903 |
| H                                        | 1.484852  | -0.569061 | -1.298715 |
| H                                        | 1.618187  | 1.146557  | -0.905608 |
| H                                        | 2.800839  | 0.010047  | -0.276959 |
| C                                        | 0.888056  | -0.096955 | 0.722792  |
| H                                        | 1.145511  | -1.059458 | 1.174769  |
| H                                        | 1.093019  | 0.667575  | 1.479912  |
| C                                        | -0.605209 | -0.105423 | 0.458037  |
| H                                        | -1.110914 | -0.233060 | 1.428762  |
| C                                        | -1.109980 | 1.168788  | -0.183279 |
| H                                        | -0.680882 | 1.296545  | -1.179020 |
| H                                        | -2.198255 | 1.149571  | -0.284941 |
| H                                        | -0.849240 | 2.040714  | 0.421454  |
| O                                        | -0.874411 | -1.230553 | -0.360818 |
| H                                        | -1.799406 | -1.225971 | -0.610988 |
| $E_{0K} = -233.5866519$ $ZPE = 0.136167$ |           |           |           |

| Structure 6                              |           |           |           |
|------------------------------------------|-----------|-----------|-----------|
| C                                        | 2.025195  | 0.057221  | 0.105448  |
| H                                        | 2.073684  | 1.065773  | -0.308789 |
| H                                        | 2.107112  | 0.143183  | 1.192577  |
| H                                        | 2.904222  | -0.482316 | -0.248655 |
| C                                        | 0.744512  | -0.649096 | -0.291370 |
| H                                        | 0.619803  | -0.646280 | -1.380385 |
| H                                        | 0.799383  | -1.702841 | 0.010601  |
| C                                        | -0.502256 | -0.042869 | 0.327247  |
| H                                        | -0.383950 | -0.053128 | 1.424981  |
| C                                        | -0.752552 | 1.374883  | -0.119936 |
| H                                        | -0.808820 | 1.419108  | -1.210903 |
| H                                        | -1.698695 | 1.735860  | 0.283917  |
| H                                        | 0.040167  | 2.044107  | 0.216182  |
| O                                        | -1.653963 | -0.782101 | -0.034830 |
| H                                        | -1.510591 | -1.707494 | 0.170780  |
| $E_{0K} = -233.5872464$ $ZPE = 0.135853$ |           |           |           |

| Structure 8                              |           |           |           |
|------------------------------------------|-----------|-----------|-----------|
| C                                        | 1.746730  | 0.140054  | -0.491941 |
| H                                        | 1.583455  | -0.665079 | -1.213486 |
| H                                        | 1.561955  | 1.088792  | -1.000387 |
| H                                        | 2.805147  | 0.116076  | -0.230203 |
| C                                        | 0.878550  | -0.028296 | 0.739829  |
| H                                        | 1.162417  | -0.943444 | 1.267805  |
| H                                        | 1.054126  | 0.800976  | 1.434275  |
| C                                        | -0.615726 | -0.105831 | 0.456682  |
| H                                        | -1.127217 | -0.233916 | 1.417233  |
| C                                        | -1.161895 | 1.132498  | -0.220701 |
| H                                        | -0.738046 | 1.251607  | -1.222466 |
| H                                        | -2.245185 | 1.063800  | -0.322953 |
| H                                        | -0.922215 | 2.033416  | 0.348962  |
| O                                        | -0.947787 | -1.271671 | -0.275518 |
| H                                        | -0.638091 | -1.169408 | -1.177845 |
| $E_{0K} = -233.5860657$ $ZPE = 0.136032$ |           |           |           |

---

| Structure 9 |           |           |           |
|-------------|-----------|-----------|-----------|
| C           | 1.740544  | 0.168853  | -0.492692 |
| H           | 1.470937  | -0.482040 | -1.326575 |
| H           | 1.629987  | 1.201024  | -0.830258 |
| H           | 2.796922  | 0.011658  | -0.271259 |
| C           | 0.878054  | -0.117695 | 0.720588  |
| H           | 1.142195  | -1.095931 | 1.142010  |
| H           | 1.080410  | 0.611628  | 1.513272  |
| C           | -0.618712 | -0.114717 | 0.444253  |
| H           | -1.134365 | -0.271520 | 1.405348  |
| C           | -1.113337 | 1.175639  | -0.159387 |
| H           | -0.689817 | 1.317575  | -1.155383 |
| H           | -2.198857 | 1.158702  | -0.257040 |
| H           | -0.831906 | 2.027624  | 0.462916  |
| O           | -0.984560 | -1.145177 | -0.457722 |
| H           | -0.708317 | -1.989782 | -0.097825 |

---

$E_{0K} = -233.5867815$        $ZPE = 0.136197$

---

1b) C<sub>2</sub>H<sub>4</sub>(OH)OO•

| Structure 1                    |           |                |           |
|--------------------------------|-----------|----------------|-----------|
| C                              | 1.109789  | 0.447880       | -0.317237 |
| H                              | 0.957889  | 0.442080       | -1.406883 |
| H                              | 1.915215  | 1.157449       | -0.109720 |
| O                              | 1.518919  | -0.796772      | 0.162092  |
| H                              | 0.758789  | -1.388215      | 0.138482  |
| C                              | -0.145956 | 0.962337       | 0.339223  |
| H                              | -0.132264 | 0.787075       | 1.417598  |
| H                              | -0.308228 | 2.020358       | 0.130758  |
| O                              | -1.326144 | 0.321872       | -0.199576 |
| O                              | -1.314575 | -0.960106      | -0.000285 |
| E <sub>0K</sub> = -304.6871528 |           | ZPE = 0.077052 |           |

| Structure 4                    |           |                |           |
|--------------------------------|-----------|----------------|-----------|
| C                              | 1.023172  | 0.277804       | 0.544915  |
| H                              | 1.707475  | 1.061784       | 0.877296  |
| H                              | 0.629939  | -0.217321      | 1.441598  |
| O                              | 1.759376  | -0.599123      | -0.261019 |
| H                              | 1.210751  | -1.352256      | -0.490170 |
| C                              | -0.117593 | 0.919511       | -0.195976 |
| H                              | -0.632062 | 1.666076       | 0.412054  |
| H                              | 0.213669  | 1.351655       | -1.141031 |
| O                              | -1.088978 | -0.082456      | -0.583365 |
| O                              | -1.740804 | -0.530148      | 0.445212  |
| E <sub>0K</sub> = -304.6864821 |           | ZPE = 0.076795 |           |

| Structure 2                   |           |                |           |
|-------------------------------|-----------|----------------|-----------|
| C                             | 1.238443  | 0.461556       | -0.160803 |
| H                             | 1.277591  | 0.661902       | -1.239396 |
| H                             | 1.986744  | 1.105558       | 0.323341  |
| O                             | 1.446691  | -0.892560      | 0.128025  |
| H                             | 2.174878  | -1.232954      | -0.391666 |
| C                             | -0.113932 | 0.848531       | 0.357166  |
| H                             | -0.268680 | 0.501542       | 1.379449  |
| H                             | -0.261417 | 1.928521       | 0.291049  |
| O                             | -1.137197 | 0.248254       | -0.463693 |
| O                             | -1.766516 | -0.708831      | 0.143048  |
| E <sub>0K</sub> = -304.682289 |           | ZPE = 0.076337 |           |

| Structure 5                    |           |                |           |
|--------------------------------|-----------|----------------|-----------|
| C                              | 0.996647  | 0.184008       | 0.581044  |
| H                              | 1.609527  | 0.926452       | 1.111059  |
| H                              | 0.580057  | -0.500844      | 1.329433  |
| O                              | 1.732175  | -0.490160      | -0.405227 |
| H                              | 2.289177  | -1.155135      | -0.000851 |
| C                              | -0.133727 | 0.904640       | -0.087490 |
| H                              | -0.636684 | 1.583592       | 0.603280  |
| H                              | 0.212342  | 1.444817       | -0.969597 |
| O                              | -1.121903 | -0.019201      | -0.595440 |
| O                              | -1.764265 | -0.594485      | 0.371336  |
| E <sub>0K</sub> = -304.6846053 |           | ZPE = 0.076451 |           |

| Structure 3                    |           |                |           |
|--------------------------------|-----------|----------------|-----------|
| C                              | 1.003292  | 0.173495       | 0.589968  |
| H                              | 1.636934  | 0.914716       | 1.096309  |
| H                              | 0.588496  | -0.478631      | 1.361640  |
| O                              | 1.733938  | -0.643767      | -0.280447 |
| H                              | 2.183864  | -0.105176      | -0.933442 |
| C                              | -0.126676 | 0.903808       | -0.084594 |
| H                              | -0.627235 | 1.583054       | 0.609450  |
| H                              | 0.211836  | 1.459507       | -0.962675 |
| O                              | -1.116168 | -0.008893      | -0.602804 |
| O                              | -1.774470 | -0.577001      | 0.357809  |
| E <sub>0K</sub> = -304.6832307 |           | ZPE = 0.076728 |           |

| Structure 6                    |           |                |           |
|--------------------------------|-----------|----------------|-----------|
| C                              | -0.908554 | -0.328818      | 0.369346  |
| H                              | -0.567485 | -1.344769      | 0.139934  |
| H                              | -0.932878 | -0.229147      | 1.456594  |
| O                              | -2.204177 | -0.075732      | -0.101798 |
| H                              | -2.288669 | -0.398755      | -1.000251 |
| C                              | 0.073243  | 0.666764       | -0.210502 |
| H                              | 0.116344  | 0.603219       | -1.300728 |
| H                              | -0.170313 | 1.686205       | 0.090637  |
| O                              | 1.392172  | 0.417072       | 0.304985  |
| O                              | 1.918862  | -0.634394      | -0.245594 |
| E <sub>0K</sub> = -304.6832233 |           | ZPE = 0.076715 |           |

| Structure 7            |           |                  |           |
|------------------------|-----------|------------------|-----------|
| C                      | -0.900039 | -0.384028        | 0.301976  |
| H                      | -0.572167 | -1.368572        | -0.037154 |
| H                      | -0.885836 | -0.393824        | 1.398638  |
| O                      | -2.184251 | -0.165910        | -0.215666 |
| H                      | -2.601448 | 0.561825         | 0.247461  |
| C                      | 0.068774  | 0.658295         | -0.213502 |
| H                      | 0.130356  | 0.637449         | -1.302624 |
| H                      | -0.199101 | 1.662679         | 0.122921  |
| O                      | 1.380414  | 0.424509         | 0.328895  |
| O                      | 1.943310  | -0.601744        | -0.233240 |
| $E_{0K} = -304.682705$ |           | $ZPE = 0.076817$ |           |

| Structure 10            |           |                  |           |
|-------------------------|-----------|------------------|-----------|
| C                       | 1.247518  | 0.500806         | -0.249973 |
| H                       | 1.212947  | 0.555130         | -1.340593 |
| H                       | 1.852447  | 1.350416         | 0.094634  |
| O                       | 1.833182  | -0.730689        | 0.066702  |
| H                       | 1.939281  | -0.805548        | 1.016693  |
| C                       | -0.140585 | 0.660349         | 0.299093  |
| H                       | -0.195095 | 0.441858         | 1.369771  |
| H                       | -0.532000 | 1.665923         | 0.122556  |
| O                       | -1.001855 | -0.274605        | -0.380587 |
| O                       | -2.196224 | -0.266545        | 0.119162  |
| $E_{0K} = -304.6823577$ |           | $ZPE = 0.076388$ |           |

| Structure 8             |           |                  |           |
|-------------------------|-----------|------------------|-----------|
| C                       | -0.899911 | -0.376268        | 0.297185  |
| H                       | -0.575998 | -1.353772        | -0.080485 |
| H                       | -0.886504 | -0.415794        | 1.394463  |
| O                       | -2.154779 | 0.001628         | -0.203882 |
| H                       | -2.810744 | -0.654957        | 0.030876  |
| C                       | 0.073581  | 0.673072         | -0.175058 |
| H                       | 0.129072  | 0.704902         | -1.264186 |
| H                       | -0.187872 | 1.658196         | 0.212950  |
| O                       | 1.383795  | 0.392478         | 0.346713  |
| O                       | 1.932238  | -0.609031        | -0.271129 |
| $E_{0K} = -304.6833291$ |           | $ZPE = 0.076660$ |           |

| Structure 11            |           |                  |           |
|-------------------------|-----------|------------------|-----------|
| C                       | -1.117000 | 0.506588         | 0.016254  |
| H                       | -1.086248 | 1.108653         | 0.932684  |
| H                       | -1.106284 | 1.203772         | -0.823951 |
| O                       | -2.295022 | -0.247031        | -0.087623 |
| H                       | -2.448069 | -0.721056        | 0.731270  |
| C                       | 0.094381  | -0.391917        | -0.051254 |
| H                       | 0.133502  | -1.095940        | 0.785206  |
| H                       | 0.128949  | -0.951767        | -0.988301 |
| O                       | 1.255970  | 0.453843         | 0.022937  |
| O                       | 2.353285  | -0.235773        | 0.011321  |
| $E_{0K} = -304.6812532$ |           | $ZPE = 0.076391$ |           |

| Structure 9             |           |                  |           |
|-------------------------|-----------|------------------|-----------|
| C                       | -1.264708 | 0.491362         | 0.245891  |
| H                       | -1.265169 | 0.532648         | 1.343365  |
| H                       | -1.908079 | 1.300130         | -0.106636 |
| O                       | -1.809399 | -0.707912        | -0.229135 |
| H                       | -1.300035 | -1.443571        | 0.117722  |
| C                       | 0.127940  | 0.729478         | -0.260812 |
| H                       | 0.198939  | 0.600236         | -1.342389 |
| H                       | 0.514585  | 1.710649         | 0.025501  |
| O                       | 0.964259  | -0.275752        | 0.356666  |
| O                       | 2.167686  | -0.269477        | -0.121036 |
| $E_{0K} = -304.6854554$ |           | $ZPE = 0.076679$ |           |

| Structure 12            |           |                  |           |
|-------------------------|-----------|------------------|-----------|
| C                       | 1.111029  | 0.495035         | 0.000189  |
| H                       | 1.085051  | 1.143347         | -0.885313 |
| H                       | 1.085745  | 1.143137         | 0.885860  |
| O                       | 2.226023  | -0.356393        | -0.000276 |
| H                       | 3.030858  | 0.161873         | -0.000768 |
| C                       | -0.097614 | -0.401093        | 0.000436  |
| H                       | -0.132573 | -1.033528        | -0.889007 |
| H                       | -0.132966 | -1.032868        | 0.890333  |
| O                       | -1.249922 | 0.458773         | -0.000077 |
| O                       | -2.353177 | -0.220582        | -0.000254 |
| $E_{0K} = -304.6818343$ |           | $ZPE = 0.076344$ |           |

**S2) Structures of the HOQ•OOH radicals corresponding to internal H-transfers of radicals from table 3**

2a) Group 1

| $\beta$ -HOROO•       | $\gamma$ -HOQ•OOH     |                       |                       | $\delta$ -HOQ•OOH     |
|-----------------------|-----------------------|-----------------------|-----------------------|-----------------------|
|                       |                       |                       |                       |                       |
| <b>R<sub>2</sub></b>  | <b>R<sub>19</sub></b> | <b>R<sub>21</sub></b> | <b>R<sub>35</sub></b> | <b>R<sub>23</sub></b> |
|                       |                       |                       |                       |                       |
| <b>R<sub>3</sub></b>  | <b>R<sub>20</sub></b> | <b>R<sub>22</sub></b> | <b>R<sub>46</sub></b> | <b>R<sub>24</sub></b> |
|                       |                       |                       |                       |                       |
| <b>R<sub>19</sub></b> | <b>R<sub>23</sub></b> | <b>R<sub>42</sub></b> | <b>R<sub>47</sub></b> | <b>R<sub>27</sub></b> |
|                       |                       |                       |                       |                       |
| <b>R<sub>20</sub></b> | <b>R<sub>24</sub></b> | <b>R<sub>43</sub></b> | <b>R<sub>48</sub></b> | <b>R<sub>28</sub></b> |
|                       |                       |                       |                       |                       |
| <b>R<sub>21</sub></b> | <b>R<sub>25</sub></b> | <b>R<sub>44</sub></b> | <b>R<sub>49</sub></b> | <b>R<sub>29</sub></b> |
|                       |                       |                       |                       |                       |
| <b>R<sub>22</sub></b> | <b>R<sub>26</sub></b> | <b>R<sub>45</sub></b> | <b>R<sub>50</sub></b> | <b>R<sub>30</sub></b> |

2b) Group 2

| $\beta$ -HOQ•OOH                                                                                            | $\gamma$ -HOQ•OOH                                                                                            |                                                                                                              | $\delta$ -HOQ•OOH                                                                                              |
|-------------------------------------------------------------------------------------------------------------|--------------------------------------------------------------------------------------------------------------|--------------------------------------------------------------------------------------------------------------|----------------------------------------------------------------------------------------------------------------|
|                                                                                                             | 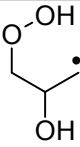<br><b>R<sub>4</sub></b>    | <br><b>R<sub>32</sub></b>   | <br><b>R<sub>7</sub></b>    |
|                                                                                                             | <br><b>R<sub>5</sub></b>    | <br><b>R<sub>33</sub></b>   | <br><b>R<sub>8</sub></b>    |
|                                                                                                             | <br><b>R<sub>6</sub></b>    | <br><b>R<sub>34</sub></b>   | <br><b>R<sub>9</sub></b>    |
| <br><b>R<sub>1</sub></b>   | <br><b>R<sub>7</sub></b>    | <br><b>R<sub>36</sub></b>   | <br><b>R<sub>13</sub></b>   |
| <br><b>R<sub>2</sub></b> | <br><b>R<sub>8</sub></b>  | <br><b>R<sub>37</sub></b> | <br><b>R<sub>14</sub></b> |
| <br><b>R<sub>3</sub></b> | <br><b>R<sub>9</sub></b>  | <br><b>R<sub>38</sub></b> | <br><b>R<sub>15</sub></b> |
| <br><b>R<sub>4</sub></b> | <br><b>R<sub>10</sub></b> | <br><b>R<sub>39</sub></b> | <br><b>R<sub>16</sub></b> |
| <br><b>R<sub>5</sub></b> | <br><b>R<sub>11</sub></b> | <br><b>R<sub>40</sub></b> | <br><b>R<sub>17</sub></b> |
| <br><b>R<sub>6</sub></b> | <br><b>R<sub>12</sub></b> | <br><b>R<sub>41</sub></b> | <br><b>R<sub>18</sub></b> |



**S3) Modified Arrhenius Fits of the unimolecular reactions of  $\beta$ -HOROO• and HOQ•OOH radicals. Units: A ( $s^{-1}$ ) and E (cal mol $^{-1}$ )**

3a) For 1,5 H-shift of  $\beta$ -HOROO• radicals from **Table 4**

| <b>Reaction</b> |                                                              | <b>k = AT<sup>n</sup>exp(-E/RT)</b> |                        |                      |          |          |
|-----------------|--------------------------------------------------------------|-------------------------------------|------------------------|----------------------|----------|----------|
| <b>R</b>        | <b>HOROO• (group 1) → <math>\gamma</math>-HOQ•OOH</b>        | <b>C<sub>-OO</sub></b>              | <b>H<sub>arr</sub></b> | <b>A</b>             | <b>n</b> | <b>E</b> |
| <b>19</b>       | HOCC(OO•)CC → HOCC(OOH)CC•                                   | t                                   | p                      | 6.23×10 <sup>3</sup> | 2.35     | 18430    |
| <b>20</b>       | HOC(C)C(OO•)CC → HOC(C)C(OOH)CC•                             | q                                   | p                      | 1.04×10 <sup>6</sup> | 1.78     | 19403    |
| <b>23</b>       | HOCC(OO•)CCC → HOCC(OOH)CC•C                                 | t                                   | s                      | 7.15×10 <sup>5</sup> | 1.67     | 16221    |
| <b>24</b>       | HOC(C)C(OO•)CCC → HOC(C)C(OOH)CC•C                           | q                                   | s                      | 2.04×10 <sup>7</sup> | 1.21     | 16239    |
| <b>25</b>       | HOCC(OO•)CCC <sub>2</sub> → HOCC(OOH)CC•C <sub>2</sub>       | t                                   | t                      | 4.77×10 <sup>6</sup> | 1.35     | 13588    |
| <b>26</b>       | HOC(C)C(OO•)CCC <sub>2</sub> → HOC(C)C(OOH)CC•C <sub>2</sub> | q                                   | t                      | 1.39×10 <sup>6</sup> | 1.51     | 12811    |

  

| <b>Reaction</b> |                                                                                        | <b>k = AT<sup>n</sup>exp(-E/RT)</b> |                        |                       |          |          |
|-----------------|----------------------------------------------------------------------------------------|-------------------------------------|------------------------|-----------------------|----------|----------|
| <b>R</b>        | <b>HOROO• (group 2) → <math>\gamma</math>-HOQ•OOH</b>                                  | <b>C<sub>-OO</sub></b>              | <b>H<sub>arr</sub></b> | <b>A</b>              | <b>n</b> | <b>E</b> |
| <b>4</b>        | C(OO•)C(OH)C → C(OOH)C(OH)C•                                                           | s                                   | p                      | 1.53×10 <sup>5</sup>  | 2.05     | 20330    |
| <b>5</b>        | CC(OO•)C(OH)C → CC(OOH)C(OH)C•                                                         | t                                   | p                      | 4.12×10 <sup>4</sup>  | 2.20     | 19784    |
| <b>6</b>        | C <sub>2</sub> C(OO•)C(OH)C → C <sub>2</sub> C(OOH)C(OH)C•                             | q                                   | p                      | 2.22×10 <sup>6</sup>  | 1.81     | 21013    |
| <b>7</b>        | C(OO•)C(OH)CC → C(OOH)C(OH)C•C                                                         | s                                   | s                      | 5.76×10 <sup>6</sup>  | 1.54     | 17944    |
| <b>8</b>        | CC(OO•)C(OH)CC → CC(OOH)C(OH)C•C                                                       | t                                   | s                      | 2.34×10 <sup>7</sup>  | 1.41     | 17829    |
| <b>9</b>        | C <sub>2</sub> C(OO•)C(OH)CC → C <sub>2</sub> C(OOH)C(OH)C•C                           | q                                   | s                      | 2.27×10 <sup>9</sup>  | 0.83     | 18664    |
| <b>10</b>       | C(OO•)C(OH)CC <sub>2</sub> → C(OOH)C(OH)C•C <sub>2</sub>                               | s                                   | t                      | 3.86×10 <sup>7</sup>  | 1.21     | 15665    |
| <b>11</b>       | CC(OO•)C(OH)CC <sub>2</sub> → CC(OOH)C(OH)C•C <sub>2</sub>                             | t                                   | t                      | 4.42×10 <sup>8</sup>  | 0.97     | 15399    |
| <b>12</b>       | C <sub>2</sub> C(OO•)C(OH)CC <sub>2</sub> → C <sub>2</sub> C(OOH)C(OH)C•C <sub>2</sub> | q                                   | t                      | 3.92×10 <sup>11</sup> | 0.17     | 16655    |

3b) For 1,6 H-shift of  $\beta$ -HOROO• radicals from **Table 5**

| R  | Réaction<br>HOROO• (groupe 1) $\rightarrow$ $\delta$ -HOQ•OOH              | C <sub>-OO</sub> | H <sub>arr</sub> | k = AT <sup>n</sup> exp(-E/RT) |      |       |
|----|----------------------------------------------------------------------------|------------------|------------------|--------------------------------|------|-------|
|    |                                                                            |                  |                  | A                              | n    | E     |
| 23 | HOCC(OO•)CCC $\rightarrow$ HOCC(OOH)CCC•                                   | t                | p                | 2.29×10 <sup>2</sup>           | 2.53 | 17005 |
| 24 | HOC(C)C(OO•)CCC $\rightarrow$ HOC(C)C(OOH)CCC•                             | q                | p                | 2.13×10 <sup>6</sup>           | 1.38 | 18485 |
| 27 | HOCC(OO•)CCCC $\rightarrow$ HOCC(OOH)CCC•C                                 | t                | s                | 8.68×10 <sup>2</sup>           | 2.31 | 13600 |
| 28 | HOC(C)C(OO•)CCCC $\rightarrow$ HOC(C)C(OOH)CCC•C                           | q                | s                | 6.09×10 <sup>6</sup>           | 1.20 | 15177 |
| 29 | HOCC(OO•)CCCC <sub>2</sub> $\rightarrow$ HOCC(OOH)CCC•C <sub>2</sub>       | t                | t                | 2.72×10 <sup>3</sup>           | 2.16 | 11165 |
| 30 | HOC(C)C(OO•)CCCC <sub>2</sub> $\rightarrow$ HOC(C)C(OOH)CCC•C <sub>2</sub> | q                | t                | 7.49×10 <sup>7</sup>           | 0.83 | 12793 |

  

| R  | Réaction<br>HOROO• (groupe 2) $\rightarrow$ $\delta$ -HOQ•OOH                                        | C <sub>-OO</sub> | H <sub>arr</sub> | k = AT <sup>n</sup> exp(-E/RT) |       |       |
|----|------------------------------------------------------------------------------------------------------|------------------|------------------|--------------------------------|-------|-------|
|    |                                                                                                      |                  |                  | A                              | n     | E     |
| 7  | C(OO•)C(OH)CC $\rightarrow$ C(OOH)C(OH)CC•                                                           | s                | p                | 8.48×10 <sup>5</sup>           | 1.59  | 19515 |
| 8  | CC(OO•)C(OH)CC $\rightarrow$ CC(OOH)C(OH)CC•                                                         | t                | p                | 7.43×10 <sup>6</sup>           | 1.34  | 20054 |
| 9  | C <sub>2</sub> C(OO•)C(OH)CC $\rightarrow$ C <sub>2</sub> C(OOH)C(OH)CC•                             | q                | p                | 1.82×10 <sup>9</sup>           | 0.68  | 20655 |
| 13 | C(OO•)C(OH)CCC $\rightarrow$ C(OOH)C(OH)CC•C                                                         | s                | s                | 8.36×10 <sup>6</sup>           | 1.26  | 16333 |
| 14 | CC(OO•)C(OH)CCC $\rightarrow$ CC(OOH)C(OH)CC•C                                                       | t                | s                | 2.64×10 <sup>7</sup>           | 1.16  | 16609 |
| 15 | C <sub>2</sub> C(OO•)C(OH)CCC $\rightarrow$ C <sub>2</sub> C(OOH)C(OH)CC•C                           | q                | s                | 2.44×10 <sup>9</sup>           | 0.62  | 17748 |
| 16 | C(OO•)C(OH)CCC <sub>2</sub> $\rightarrow$ C(OOH)C(OH)CC•C <sub>2</sub>                               | s                | t                | 4.56×10 <sup>9</sup>           | 0.40  | 14918 |
| 17 | CC(OO•)C(OH)CCC <sub>2</sub> $\rightarrow$ CC(OOH)C(OH)CC•C <sub>2</sub>                             | t                | t                | 5.25×10 <sup>10</sup>          | 0.10  | 15442 |
| 18 | C <sub>2</sub> C(OO•)C(OH)CCC <sub>2</sub> $\rightarrow$ C <sub>2</sub> C(OOH)C(OH)CC•C <sub>2</sub> | q                | t                | 4.13×10 <sup>12</sup>          | -0.39 | 16335 |

3c) For 1,4 H-shift of  $\beta$ -HOROO• radicals from **Table 7**

| R  | Réaction<br>HOROO• (groupe 1) $\rightarrow$ $\beta$ -HOQ•OOH           | C <sub>oo</sub> | H <sub>arr</sub> | k = AT <sup>n</sup> exp(-E/RT) |      |       |
|----|------------------------------------------------------------------------|-----------------|------------------|--------------------------------|------|-------|
|    |                                                                        |                 |                  | A                              | n    | E     |
| 2  | HOCC(OO•)C $\rightarrow$ HOCC(OOH)C•                                   | t               | p                | 1.35×10 <sup>-3</sup>          | 4.55 | 26985 |
| 3  | HOC(C)C(OO•)C $\rightarrow$ HOC(C)C(OOH)C•                             | q               | p                | 9.48×10 <sup>-1</sup>          | 3.73 | 26469 |
| 19 | HOCC(OO•)CC $\rightarrow$ HOCC(OOH)C•C                                 | t               | s                | 2.77×10 <sup>-1</sup>          | 3.77 | 23992 |
| 20 | HOC(C)C(OO•)CC $\rightarrow$ HOC(C)C(OOH)C•C                           | q               | s                | 1.43×10 <sup>3</sup>           | 2.76 | 24752 |
| 21 | HOCC(OO•)CC <sub>2</sub> $\rightarrow$ HOCC(OOH)C•C <sub>2</sub>       | t               | t                | 1.52×10 <sup>3</sup>           | 2.64 | 22082 |
| 22 | HOC(C)C(OO•)CC <sub>2</sub> $\rightarrow$ HOC(C)C(OOH)C•C <sub>2</sub> | q               | t                | 6.12×10 <sup>3</sup>           | 2.47 | 21089 |

  

| R | Réaction<br>HOROO• (groupe 2) $\rightarrow$ $\beta$ -HOQ•OOH           | C <sub>oo</sub> | H <sub>arr</sub> | k = AT <sup>n</sup> exp(-E/RT) |      |       |
|---|------------------------------------------------------------------------|-----------------|------------------|--------------------------------|------|-------|
|   |                                                                        |                 |                  | A                              | n    | E     |
| 1 | C(OO•)COH $\rightarrow$ C(OOH)C•(OH)                                   | s               | s                | 9.28×10 <sup>3</sup>           | 2.46 | 21874 |
| 2 | CC(OO•)COH $\rightarrow$ CC(OOH)C•(OH)                                 | t               | s                | 1.76×10 <sup>3</sup>           | 2.69 | 21498 |
| 3 | C <sub>2</sub> C(OO•)COH $\rightarrow$ C <sub>2</sub> C(OOH)C•(OH)     | q               | s                | 1.19×10 <sup>6</sup>           | 1.94 | 22661 |
| 4 | C(OO•)C(OH)C $\rightarrow$ C(OOH)C•(OH)C                               | s               | t                | 1.92×10 <sup>5</sup>           | 2.03 | 20190 |
| 5 | CC(OO•)C(OH)C $\rightarrow$ CC(OOH)C•(OH)C                             | t               | t                | 2.85×10 <sup>5</sup>           | 2.00 | 19560 |
| 6 | C <sub>2</sub> C(OO•)C(OH)C $\rightarrow$ C <sub>2</sub> C(OOH)C•(OH)C | q               | t                | 3.01×10 <sup>6</sup>           | 1.75 | 20103 |

3d) For HO<sub>2</sub>• elimination from β-HOROO• radicals from **Table 8**

| R  | Réaction<br>HOROO• (groupe 1) → énoI + HO <sub>2</sub> •                  | C <sub>-OO</sub> | H <sub>arr</sub> | k = AT <sup>n</sup> exp(-E/RT) |      |       |
|----|---------------------------------------------------------------------------|------------------|------------------|--------------------------------|------|-------|
|    |                                                                           |                  |                  | A                              | n    | E     |
| 2  | HOCC(OO•)C → HOCC=C + HO <sub>2</sub> •                                   | t                | p                | 3.86×10 <sup>7</sup>           | 1.48 | 29631 |
| 3  | HOC(C)C(OO•)C → HOC(C)C=C + HO <sub>2</sub> •                             | q                | p                | 3.03×10 <sup>9</sup>           | 1.22 | 29419 |
| 19 | HOCC(OO•)CC → HOCC=CC + HO <sub>2</sub> •                                 | t                | s                | 3.15×10 <sup>7</sup>           | 1.58 | 28744 |
| 20 | HOC(C)C(OO•)CC → HOC(C)C=CC + HO <sub>2</sub> •                           | q                | s                | 3.89×10 <sup>9</sup>           | 1.07 | 29027 |
| 21 | HOCC(OO•)CC <sub>2</sub> → HOCC=CC <sub>2</sub> + HO <sub>2</sub> •       | t                | t                | 6.96×10 <sup>7</sup>           | 1.49 | 28328 |
| 22 | HOC(C)C(OO•)CC <sub>2</sub> → HOC(C)C=CC <sub>2</sub> + HO <sub>2</sub> • | q                | t                | 2.38×10 <sup>11</sup>          | 0.59 | 29894 |

  

| R | Réaction<br>HOROO• (groupe 2) → énoI + HO <sub>2</sub> •                  | C <sub>-OO</sub> | H <sub>arr</sub> | k = AT <sup>n</sup> exp(-E/RT) |       |       |
|---|---------------------------------------------------------------------------|------------------|------------------|--------------------------------|-------|-------|
|   |                                                                           |                  |                  | A                              | n     | E     |
| 1 | C(OO•)COH → C=COH + HO <sub>2</sub> •                                     | s                | s                | 1.49×10 <sup>13</sup>          | 0.03  | 33209 |
| 2 | CC(OO•)COH → CC=COH + HO <sub>2</sub> •                                   | t                | s                | 2.07×10 <sup>13</sup>          | 0.00  | 32999 |
| 3 | C <sub>2</sub> C(OO•)COH → C <sub>2</sub> C=COH + HO <sub>2</sub> •       | q                | s                | 2.26×10 <sup>16</sup>          | -0.82 | 33642 |
| 4 | C(OO•)C(OH)C → C=C(OH)C + HO <sub>2</sub> •                               | s                | t                | 3.65×10 <sup>13</sup>          | -0.15 | 34790 |
| 5 | CC(OO•)C(OH)C → CC=C(OH)C + HO <sub>2</sub> •                             | t                | t                | 6.12×10 <sup>14</sup>          | -0.47 | 34516 |
| 6 | C <sub>2</sub> C(OO•)C(OH)C → C <sub>2</sub> C=C(OH)C + HO <sub>2</sub> • | q                | t                | 1.01×10 <sup>17</sup>          | -1.01 | 35174 |

3e) For cyclic ether formation from  $\beta$ -,  $\gamma$ -, and  $\delta$ -HOQ•OOH radicals from **Table 9** - Group 1

| <b>Reaction</b> |                                                                                        | $k = AT^n \exp(-E/RT)$ |          |                       |       |       |
|-----------------|----------------------------------------------------------------------------------------|------------------------|----------|-----------------------|-------|-------|
| <b>R</b>        | $\beta$ -HOQ•OOH (group 1) $\rightarrow$ hydroxy-oxirane + •OH                         | $C_{\cdot\text{OOH}}$  | $C\cdot$ | A                     | n     | E     |
| 2               | HOCC(OOH)C• $\rightarrow$ HOC-cycle[CCO] + •OH                                         | t                      | p        | $2.26 \times 10^{10}$ | 0.56  | 10498 |
| 3               | HOC(C)C(OOH)C• $\rightarrow$ HOC(C)-cycle[CCO] + •OH                                   | q                      | p        | $4.31 \times 10^{11}$ | 0.10  | 9747  |
| 19              | HOCC(OOH)C•C $\rightarrow$ HOC-cycle[CCO]-C + •OH                                      | t                      | s        | $2.76 \times 10^9$    | 1.01  | 8031  |
| 20              | HOC(C)C(OOH)C•C $\rightarrow$ HOC(C)-cycle[CCO]-C + •OH                                | q                      | s        | $2.70 \times 10^{11}$ | 0.11  | 7546  |
| 21              | HOCC(OOH)C•C <sub>2</sub> $\rightarrow$ HOC-cycle[CCO]-C <sub>2</sub> + •OH            | t                      | t        | $7.46 \times 10^{10}$ | 0.18  | 7515  |
| 22              | HOC(C)C(OOH)C•C <sub>2</sub> $\rightarrow$ HOC(C)-cycle[CCO]-C <sub>2</sub> + •OH      | q                      | t        | $8.35 \times 10^9$    | 0.51  | 7153  |
| <b>Reaction</b> |                                                                                        | $k = AT^n \exp(-E/RT)$ |          |                       |       |       |
| <b>R</b>        | $\gamma$ -HOQ•OOH (group 1) $\rightarrow$ hydroxy-oxetane + •OH                        | $C_{\cdot\text{OOH}}$  | $C\cdot$ | A                     | n     | E     |
| 19              | HOCC(OOH)CC• $\rightarrow$ HOC-cycle[CCCCO] + •OH                                      | t                      | p        | $1.67 \times 10^{11}$ | -0.09 | 16142 |
| 20              | HOC(C)C(OOH)CC• $\rightarrow$ HOC(C)-cycle[CCCCO] + •OH                                | q                      | p        | $3.75 \times 10^{10}$ | 0.13  | 13486 |
| 23              | HOCC(OOH)CC•C $\rightarrow$ HOC-cycle[CCCCO] + •OH                                     | t                      | s        | $2.44 \times 10^{11}$ | -0.08 | 12763 |
| 24              | HOC(C)C(OOH)CC•C $\rightarrow$ HOC(C)-cycle[CCCCO] + •OH                               | q                      | s        | $1.13 \times 10^{11}$ | 0.01  | 12001 |
| 25              | HOCC(OOH)CC•C <sub>2</sub> $\rightarrow$ HOC-cycle[CCCCO]-C <sub>2</sub> + •OH         | t                      | t        | $8.09 \times 10^{10}$ | 0.08  | 11242 |
| 26              | HOC(C)C(OOH)CC•C <sub>2</sub> $\rightarrow$ HOC(C)-cycle[CCCCO]-C <sub>2</sub> + •OH   | q                      | t        | $9.77 \times 10^{10}$ | 0.17  | 10400 |
| <b>Reaction</b> |                                                                                        | $k = AT^n \exp(-E/RT)$ |          |                       |       |       |
| <b>R</b>        | $\delta$ -HOQ•OOH (group 1) $\rightarrow$ hydroxy-oxolane + •OH                        | $C_{\cdot\text{OOH}}$  | $C\cdot$ | A                     | n     | E     |
| 23              | HOCC(OOH)CCC• $\rightarrow$ HOC-cycle[CCCCCO] + •OH                                    | t                      | p        | $5.02 \times 10^{12}$ | -0.77 | 10632 |
| 24              | HOC(C)C(OOH)CCC• $\rightarrow$ HOC(C)-cycle[CCCCCO] + •OH                              | q                      | p        | $4.00 \times 10^{12}$ | -0.64 | 9932  |
| 27              | HOCC(OOH)CCC•C $\rightarrow$ HOC-cycle[CCCCCO] + •OH                                   | t                      | s        | $7.59 \times 10^{13}$ | -1.08 | 9093  |
| 28              | HOC(C)C(OOH)CCC•C $\rightarrow$ HOC(C)-cycle[CCCCCO] + •OH                             | q                      | s        | $5.01 \times 10^{14}$ | -1.30 | 8933  |
| 29              | HOCC(OOH)CCC•C <sub>2</sub> $\rightarrow$ HOC-cycle[CCCCCO]-C <sub>2</sub> + •OH       | t                      | t        | $1.55 \times 10^{15}$ | -1.42 | 7888  |
| 30              | HOC(C)C(OOH)CCC•C <sub>2</sub> $\rightarrow$ HOC(C)-cycle[CCCCCO]-C <sub>2</sub> + •OH | q                      | t        | $1.21 \times 10^{17}$ | -1.92 | 8510  |

3f) For cyclic ether formation from  $\beta$ -,  $\gamma$ -, and  $\delta$ -HOQ•OOH radicals from **Table 10** - Group 2

| <b>Reaction</b> |                                                                                                                | <b>k = AT<sup>n</sup>exp(-E/RT)</b> |           |                       |          |          |
|-----------------|----------------------------------------------------------------------------------------------------------------|-------------------------------------|-----------|-----------------------|----------|----------|
| <b>R</b>        | $\beta$ -HOQ•OOH (group 2) $\rightarrow$ hydroxy-oxirane + •OH                                                 | <b>C<sub>-OOH</sub></b>             | <b>C•</b> | <b>A</b>              | <b>n</b> | <b>E</b> |
| <b>1</b>        | C(OOH)C•(OH) $\rightarrow$ cycle[CC(OH)O] + •OH                                                                | s                                   | s         | 3.11×10 <sup>12</sup> | 0.06     | 11161    |
| <b>2</b>        | CC(OOH)C•(OH) $\rightarrow$ C-cycle[CC(OH)O] + •OH                                                             | t                                   | s         | 3.90×10 <sup>12</sup> | 0.02     | 9532     |
| <b>3</b>        | C <sub>2</sub> C(OOH)C•(OH) $\rightarrow$ C <sub>2</sub> -cycle[CC(OH)O] + •OH                                 | q                                   | s         | 9.88×10 <sup>11</sup> | 0.15     | 7890     |
| <b>4</b>        | C(OOH)C•(OH)C $\rightarrow$ cycle[CC(OH)O]-C + •OH                                                             | s                                   | t         | 8.62×10 <sup>10</sup> | 0.56     | 9184     |
| <b>5</b>        | CC(OOH)C•(OH)C $\rightarrow$ C-cycle[CC(OH)O]-C + •OH                                                          | t                                   | t         | 7.44×10 <sup>10</sup> | 0.58     | 7568     |
| <b>6</b>        | C <sub>2</sub> C(OOH)C•(OH)C $\rightarrow$ C <sub>2</sub> -cycle[CC(OH)O]-C + •OH                              | q                                   | t         | 5.56×10 <sup>13</sup> | -0.32    | 7804     |
| <b>Reaction</b> |                                                                                                                | <b>k = AT<sup>n</sup>exp(-E/RT)</b> |           |                       |          |          |
| <b>R</b>        | $\gamma$ -HOQ•OOH (group 2) $\rightarrow$ hydroxy-oxétane + •OH                                                | <b>C<sub>-OOH</sub></b>             | <b>C•</b> | <b>A</b>              | <b>n</b> | <b>E</b> |
| <b>4</b>        | C(OOH)C(OH)C• $\rightarrow$ cycle[CC(OH)CO] + •OH                                                              | s                                   | p         | 2.31×10 <sup>15</sup> | -1.08    | 21617    |
| <b>5</b>        | CC(OOH)C(OH)C• $\rightarrow$ C-cycle[CC(OH)CO] + •OH                                                           | t                                   | p         | 1.00×10 <sup>16</sup> | -1.33    | 19882    |
| <b>6</b>        | C <sub>2</sub> C(OOH)C(OH)C• $\rightarrow$ C <sub>2</sub> -cycle[CC(OH)CO] + •OH                               | q                                   | p         | 5.03×10 <sup>15</sup> | -1.21    | 19263    |
| <b>7</b>        | C(OOH)C(OH)C•C $\rightarrow$ cycle[CC(OH)CO]C + •OH                                                            | s                                   | s         | 6.83×10 <sup>13</sup> | -0.59    | 18410    |
| <b>8</b>        | CC(OOH)C(OH)C•C $\rightarrow$ C-cycle[CC(OH)CO]C + •OH                                                         | t                                   | s         | 2.18×10 <sup>14</sup> | -0.76    | 17066    |
| <b>9</b>        | C <sub>2</sub> C(OOH)C(OH)C•C $\rightarrow$ C <sub>2</sub> -cycle[CC(OH)CO]C + •OH                             | q                                   | s         | 3.69×10 <sup>14</sup> | -0.78    | 16261    |
| <b>10</b>       | C(OOH)C(OH)C•C <sub>2</sub> $\rightarrow$ cycle[CC(OH)CO]C <sub>2</sub> + •OH                                  | s                                   | t         | 1.55×10 <sup>15</sup> | -0.88    | 16666    |
| <b>11</b>       | CC(OOH)C(OH)C•C <sub>2</sub> $\rightarrow$ C-cycle[CC(OH)CO]C <sub>2</sub> + •OH                               | t                                   | t         | 1.95×10 <sup>15</sup> | -0.88    | 15839    |
| <b>12</b>       | C <sub>2</sub> C(OOH)C(OH)C•C <sub>2</sub> $\rightarrow$ C <sub>2</sub> -cycle[CC(OH)CO]C <sub>2</sub> + •OH   | q                                   | t         | 3.09×10 <sup>17</sup> | -1.56    | 16115    |
| <b>Reaction</b> |                                                                                                                | <b>k = AT<sup>n</sup>exp(-E/RT)</b> |           |                       |          |          |
| <b>R</b>        | $\delta$ -HOQ•OOH (group 2) $\rightarrow$ hydroxy-oxolane + •OH                                                | <b>C<sub>-OOH</sub></b>             | <b>C•</b> | <b>A</b>              | <b>n</b> | <b>E</b> |
| <b>7</b>        | C(OOH)C(OH)CC• $\rightarrow$ cycle[CC(OH)CCO] + •OH                                                            | s                                   | p         | 1.93×10 <sup>12</sup> | -0.42    | 12689    |
| <b>8</b>        | CC(OOH)C(OH)CC• $\rightarrow$ C-cycle[CC(OH)CCO] + •OH                                                         | t                                   | p         | 7.31×10 <sup>11</sup> | -0.31    | 12455    |
| <b>9</b>        | C <sub>2</sub> C(OOH)C(OH)CC• $\rightarrow$ C <sub>2</sub> -cycle[CC(OH)CCO] + •OH                             | q                                   | p         | 1.02×10 <sup>15</sup> | -1.25    | 14452    |
| <b>13</b>       | C(OOH)C(OH)CC•C $\rightarrow$ cycle[CC(OH)CCO]C + •OH                                                          | s                                   | s         | 1.90×10 <sup>10</sup> | 0.05     | 10767    |
| <b>14</b>       | CC(OOH)C(OH)CC•C $\rightarrow$ C-cycle[CC(OH)CCO]C + •OH                                                       | t                                   | s         | 3.89×10 <sup>11</sup> | -0.29    | 10716    |
| <b>15</b>       | C <sub>2</sub> C(OOH)C(OH)CC•C $\rightarrow$ C <sub>2</sub> -cycle[CC(OH)CCO]C + •OH                           | q                                   | s         | 1.62×10 <sup>13</sup> | -0.76    | 12015    |
| <b>16</b>       | C(OOH)C(OH)CC•C <sub>2</sub> $\rightarrow$ cycle[CC(OH)CCO]C <sub>2</sub> + •OH                                | s                                   | t         | 3.17×10 <sup>10</sup> | 0.03     | 9292     |
| <b>17</b>       | CC(OOH)C(OH)CC•C <sub>2</sub> $\rightarrow$ C-cycle[CC(OH)CCO]C <sub>2</sub> + •OH                             | t                                   | t         | 2.09×10 <sup>11</sup> | -0.18    | 9249     |
| <b>18</b>       | C <sub>2</sub> C(OOH)C(OH)CC•C <sub>2</sub> $\rightarrow$ C <sub>2</sub> -cycle[CC(OH)CCO]C <sub>2</sub> + •OH | q                                   | t         | 1.25×10 <sup>12</sup> | -0.52    | 8175     |

3g) For  $\beta$ -scission of  $\beta$ -HOQ•OOH radicals from **Table 11**

| R  | Réaction<br>$\beta$ -HOQ•OOH (groupe 1) $\rightarrow$ énonl + HO <sub>2</sub> •        | C <sub>OOH</sub> | C• | k = AT <sup>n</sup> exp(-E/RT) |      |       |
|----|----------------------------------------------------------------------------------------|------------------|----|--------------------------------|------|-------|
|    |                                                                                        |                  |    | A                              | n    | E     |
| 2  | HOCC(OOH)C• $\rightarrow$ HOCC=C + HO <sub>2</sub> •                                   | t                | p  | 8.17×10 <sup>9</sup>           | 0.80 | 14231 |
| 3  | HOC(C)C(OOH)C• $\rightarrow$ HOC(C)C=C + HO <sub>2</sub> •                             | q                | p  | 5.06×10 <sup>10</sup>          | 0.54 | 13832 |
| 19 | HOCC(OOH)C•C $\rightarrow$ HOCC=CC + HO <sub>2</sub> •                                 | t                | s  | 1.97×10 <sup>10</sup>          | 0.74 | 14280 |
| 20 | HOC(C)C(OOH)C•C $\rightarrow$ HOC(C)C=CC + HO <sub>2</sub> •                           | q                | s  | 1.00×10 <sup>11</sup>          | 0.48 | 13393 |
| 21 | HOCC(OOH)C•C <sub>2</sub> $\rightarrow$ HOCC=CC <sub>2</sub> + HO <sub>2</sub> •       | t                | t  | 2.26×10 <sup>11</sup>          | 0.43 | 13893 |
| 22 | HOC(C)C(OOH)C•C <sub>2</sub> $\rightarrow$ HOC(C)C=CC <sub>2</sub> + HO <sub>2</sub> • | q                | t  | 2.66×10 <sup>11</sup>          | 0.45 | 13755 |

  

| R | Réaction<br>$\beta$ -HOQ•OOH (groupe 2) $\rightarrow$ énonl + HO <sub>2</sub> •        | C <sub>OOH</sub> | C• | k = AT <sup>n</sup> exp(-E/RT) |       |       |
|---|----------------------------------------------------------------------------------------|------------------|----|--------------------------------|-------|-------|
|   |                                                                                        |                  |    | A                              | n     | E     |
| 1 | C(OOH)C•(OH) $\rightarrow$ C=COH + HO <sub>2</sub> •                                   | s                | s  | 3.25×10 <sup>12</sup>          | 0.33  | 15980 |
| 2 | CC(OOH)C•(OH) $\rightarrow$ CC=COH + HO <sub>2</sub> •                                 | t                | s  | 5.22×10 <sup>14</sup>          | -0.24 | 16658 |
| 3 | C <sub>2</sub> C(OOH)C•(OH) $\rightarrow$ C <sub>2</sub> C=COH + HO <sub>2</sub> •     | q                | s  | 6.39×10 <sup>14</sup>          | -0.35 | 16490 |
| 4 | C(OOH)C•(OH)C $\rightarrow$ C=C(OH)C + HO <sub>2</sub> •                               | s                | t  | 5.46×10 <sup>10</sup>          | 0.92  | 14881 |
| 5 | CC(OOH)C•(OH)C $\rightarrow$ CC=C(OH)C + HO <sub>2</sub> •                             | t                | t  | 1.22×10 <sup>13</sup>          | 0.24  | 15271 |
| 6 | C <sub>2</sub> C(OOH)C•(OH)C $\rightarrow$ C <sub>2</sub> C=C(OH)C + HO <sub>2</sub> • | q                | t  | 2.23×10 <sup>14</sup>          | -0.18 | 16442 |

3h) For substitution of H-atoms by methyl groups in the cyclic part of transition states involved in the 1,5 H-shift of  $\beta$ -HOROO• radicals from **Table 12** - Group 1

| R                           | Reaction<br>HOROO• (group 1) $\rightarrow$ $\gamma$ -HOQ•OOH                                               | C <sub>-oo</sub> | H <sub>arr</sub> | k = AT <sup>n</sup> exp(-E/RT) |      |       |
|-----------------------------|------------------------------------------------------------------------------------------------------------|------------------|------------------|--------------------------------|------|-------|
|                             |                                                                                                            |                  |                  | A                              | n    | E     |
| <u>Without substitution</u> |                                                                                                            |                  |                  |                                |      |       |
| 19                          | HOCC(OO•)CC $\rightarrow$ HOCC(OOH)CC•                                                                     | t                | p                | 6.23×10 <sup>3</sup>           | 2.35 | 18430 |
| 20                          | HOC(C)C(OO•)CC $\rightarrow$ HOC(C)C(OOH)CC•                                                               | q                | p                | 1.04×10 <sup>6</sup>           | 1.78 | 19403 |
| 23                          | HOCC(OO•)CCC $\rightarrow$ HOCC(OOH)CC•C                                                                   | t                | s                | 7.15×10 <sup>5</sup>           | 1.67 | 16221 |
| 24                          | HOC(C)C(OO•)CCC $\rightarrow$ HOC(C)C(OOH)CC•C                                                             | q                | s                | 2.04×10 <sup>7</sup>           | 1.21 | 16239 |
| 25                          | HOCC(OO•)CCC <sub>2</sub> $\rightarrow$ HOCC(OOH)CC•C <sub>2</sub>                                         | t                | t                | 4.77×10 <sup>6</sup>           | 1.35 | 13588 |
| 26                          | HOC(C)C(OO•)CCC <sub>2</sub> $\rightarrow$ HOC(C)C(OOH)CC•C <sub>2</sub>                                   | q                | t                | 1.39×10 <sup>6</sup>           | 1.51 | 12811 |
| <u>First substitution</u>   |                                                                                                            |                  |                  |                                |      |       |
| 21                          | HOCC(OO•)CC <sub>2</sub> $\rightarrow$ HOCC(OOH)C(C)C•                                                     | t                | p                | 3.10×10 <sup>5</sup>           | 1.84 | 19281 |
| 22                          | HOC(C)C(OO•)CC <sub>2</sub> $\rightarrow$ HOC(C)C(OOH)C(C)C•                                               | q                | p                | 2.67×10 <sup>6</sup>           | 1.70 | 18609 |
| 42                          | HOCC(OO•)C(C)CC $\rightarrow$ HOCC(OOH)C(C)C•C                                                             | t                | s                | 2.07×10 <sup>4</sup>           | 2.06 | 14389 |
| 43                          | HOC(C)C(OO•)C(C)CC $\rightarrow$ HOC(C)C(OOH)C(C)C•C                                                       | q                | s                | 2.44×10 <sup>5</sup>           | 1.78 | 13844 |
| 44                          | HOCC(OO•)C(C)CC <sub>2</sub> $\rightarrow$ HOCC(OOH)C(C)C•C <sub>2</sub>                                   | t                | t                | 1.56×10 <sup>6</sup>           | 1.50 | 13053 |
| 45                          | HOC(C)C(OO•)C(C)CC <sub>2</sub> $\rightarrow$ HOC(C)C(OOH)C(C)C•C <sub>2</sub>                             | q                | t                | 1.35×10 <sup>8</sup>           | 1.06 | 12964 |
| <u>Second substitution</u>  |                                                                                                            |                  |                  |                                |      |       |
| 35                          | HOCC(OO•)C(C <sub>2</sub> )C $\rightarrow$ HOCC(OOH)C(C <sub>2</sub> )C•                                   | t                | p                | 3.66×10 <sup>6</sup>           | 1.69 | 19284 |
| 46                          | HOC(C)C(OO•)C(C <sub>2</sub> )C $\rightarrow$ HOC(C)C(OOH)C(C <sub>2</sub> )C•                             | q                | p                | 2.67×10 <sup>6</sup>           | 1.70 | 18609 |
| 47                          | HOCC(OO•)C(C <sub>2</sub> )CC $\rightarrow$ HOCC(OOH)C(C <sub>2</sub> )C•C                                 | t                | s                | 3.72×10 <sup>4</sup>           | 2.09 | 14706 |
| 48                          | HOC(C)C(OO•)C(C <sub>2</sub> )CC $\rightarrow$ HOC(C)C(OOH)C(C <sub>2</sub> )C•C                           | q                | s                | 2.37×10 <sup>6</sup>           | 1.69 | 14313 |
| 49                          | HOCC(OO•)C(C <sub>2</sub> )CC <sub>2</sub> $\rightarrow$ HOCC(OOH)C(C <sub>2</sub> )C•C <sub>2</sub>       | t                | t                | 3.21×10 <sup>6</sup>           | 1.48 | 12509 |
| 50                          | HOC(C)C(OO•)C(C <sub>2</sub> )CC <sub>2</sub> $\rightarrow$ HOC(C)C(OOH)C(C <sub>2</sub> )C•C <sub>2</sub> | q                | t                | 5.31×10 <sup>7</sup>           | 1.14 | 11632 |



3i) For substitution of H-atoms by methyl groups in the cyclic part of transition states involved in the 1,5 H-shift of  $\beta$ -HOROO• radicals from **Table 13** - Group 2

| <b>R</b>                    | <b>Reaction</b><br>HOROO• (group 2) $\rightarrow$ $\gamma$ -HOQ•OOH     | $C_{-OO}$ | $H_{arr}$ | $k = AT^n \exp(-E/RT)$ |      |       |
|-----------------------------|-------------------------------------------------------------------------|-----------|-----------|------------------------|------|-------|
|                             |                                                                         |           |           | A                      | n    | E     |
| <u>Without substitution</u> |                                                                         |           |           |                        |      |       |
| <b>4</b>                    | $C(OO\bullet)C(OH)C \rightarrow C(OOH)C(OH)C\bullet$                    | s         | p         | $1.53 \times 10^5$     | 2.05 | 20330 |
| <b>5</b>                    | $CC(OO\bullet)C(OH)C \rightarrow CC(OOH)C(OH)C\bullet$                  | t         | p         | $4.12 \times 10^4$     | 2.20 | 19784 |
| <b>6</b>                    | $C_2C(OO\bullet)C(OH)C \rightarrow C_2C(OOH)C(OH)C\bullet$              | q         | p         | $2.22 \times 10^6$     | 1.81 | 21013 |
| <b>7</b>                    | $C(OO\bullet)C(OH)CC \rightarrow C(OOH)C(OH)C\bullet C$                 | s         | s         | $5.76 \times 10^6$     | 1.54 | 17944 |
| <b>8</b>                    | $CC(OO\bullet)C(OH)CC \rightarrow CC(OOH)C(OH)C\bullet C$               | t         | s         | $2.34 \times 10^7$     | 1.41 | 17829 |
| <b>9</b>                    | $C_2C(OO\bullet)C(OH)CC \rightarrow C_2C(OOH)C(OH)C\bullet C$           | q         | s         | $2.27 \times 10^9$     | 0.83 | 18664 |
| <b>10</b>                   | $C(OO\bullet)C(OH)CC_2 \rightarrow C(OOH)C(OH)C\bullet C_2$             | s         | t         | $3.86 \times 10^7$     | 1.21 | 15665 |
| <b>11</b>                   | $CC(OO\bullet)C(OH)CC_2 \rightarrow CC(OOH)C(OH)C\bullet C_2$           | t         | t         | $4.42 \times 10^8$     | 0.97 | 15399 |
| <b>12</b>                   | $C_2C(OO\bullet)C(OH)CC_2 \rightarrow C_2C(OOH)C(OH)C\bullet C_2$       | q         | t         | $3.92 \times 10^{11}$  | 0.17 | 16655 |
| <u>With substitution</u>    |                                                                         |           |           |                        |      |       |
| <b>32</b>                   | $C(OO\bullet)C(OH)(C)C \rightarrow C(OOH)C(OH)(C)C\bullet$              | s         | p         | $1.01 \times 10^7$     | 1.46 | 20173 |
| <b>33</b>                   | $CC(OO\bullet)C(OH)(C)C \rightarrow CC(OOH)C(OH)(C)C\bullet$            | t         | p         | $2.11 \times 10^5$     | 1.96 | 19816 |
| <b>34</b>                   | $C_2C(OO\bullet)C(OH)(C)C \rightarrow C_2C(OOH)C(OH)(C)C\bullet$        | q         | p         | $7.22 \times 10^5$     | 1.90 | 19784 |
| <b>36</b>                   | $C(OO\bullet)C(OH)(C)CC \rightarrow C(OOH)C(OH)(C)C\bullet C$           | s         | s         | $1.66 \times 10^5$     | 1.87 | 15190 |
| <b>37</b>                   | $CC(OO\bullet)C(OH)(C)CC \rightarrow CC(OOH)C(OH)(C)C\bullet C$         | t         | s         | $8.48 \times 10^4$     | 2.11 | 14922 |
| <b>38</b>                   | $C_2C(OO\bullet)C(OH)(C)CC \rightarrow C_2C(OOH)C(OH)(C)C\bullet C$     | q         | s         | $1.07 \times 10^6$     | 1.73 | 15736 |
| <b>39</b>                   | $C(OO\bullet)C(OH)(C)CC_2 \rightarrow C(OOH)C(OH)(C)C\bullet C_2$       | s         | t         | $5.42 \times 10^8$     | 0.78 | 14328 |
| <b>40</b>                   | $CC(OO\bullet)C(OH)(C)CC_2 \rightarrow CC(OOH)C(OH)(C)C\bullet C_2$     | t         | t         | $5.97 \times 10^7$     | 1.17 | 13441 |
| <b>41</b>                   | $C_2C(OO\bullet)C(OH)(C)CC_2 \rightarrow C_2C(OOH)C(OH)(C)C\bullet C_2$ | q         | t         | $6.82 \times 10^5$     | 1.74 | 11660 |

3j) For Waddington mechanism of  $\beta$ -HOROO• radicals from **Table 15**

| R  | Réaction<br>HOROO• → R'•O + •OH                                       | C <sub>-OO</sub> | C <sub>-OH</sub> | k               | k = AT <sup>n</sup> exp(-E/RT) |       |       |
|----|-----------------------------------------------------------------------|------------------|------------------|-----------------|--------------------------------|-------|-------|
|    |                                                                       |                  |                  |                 | A                              | n     | E     |
| 1  | C(OO•)COH → C(OOH)CO•                                                 | s                | s                | k <sub>1</sub>  | 8.84×10 <sup>10</sup>          | 0.12  | 21163 |
|    | C(OOH)CO• → C(OO•)COH                                                 |                  |                  | k <sub>-1</sub> | 1.28×10 <sup>12</sup>          | -0.23 | -593  |
|    | C(OOH)CO• → 2 C=O + •OH                                               |                  |                  | k <sub>2</sub>  | 4.42×10 <sup>15</sup>          | -0.38 | 9847  |
| 2  | CC(OO•)COH → CC(OOH)CO•                                               | t                | s                | k <sub>1</sub>  | 2.61×10 <sup>10</sup>          | 0.29  | 20378 |
|    | CC(OOH)CO• → CC(OO•)COH                                               |                  |                  | k <sub>-1</sub> | 8.86×10 <sup>15</sup>          | -1.36 | 1500  |
|    | CC(OOH)CO• → CC=O + C=O + •OH                                         |                  |                  | k <sub>2</sub>  | 1.99×10 <sup>19</sup>          | -1.50 | 10820 |
| 3  | C <sub>2</sub> C(OO•)COH → C <sub>2</sub> C(OOH)CO•                   | q                | s                | k <sub>1</sub>  | 5.75×10 <sup>13</sup>          | -0.64 | 21610 |
|    | C <sub>2</sub> C(OOH)CO• → C <sub>2</sub> C(OO•)COH                   |                  |                  | k <sub>-1</sub> | 1.09×10 <sup>16</sup>          | -1.41 | 389   |
|    | C <sub>2</sub> C(OOH)CO• → C <sub>2</sub> C=O + C=O + •OH             |                  |                  | k <sub>2</sub>  | 6.35×10 <sup>18</sup>          | -1.52 | 8047  |
| 7  | C(OO•)C(OH)CC → C(OOH)C(O•)CC                                         | s                | t                | k <sub>1</sub>  | 1.18×10 <sup>10</sup>          | 0.39  | 20322 |
|    | C(OOH)C(O•)CC → C(OO•)C(OH)CC                                         |                  |                  | k <sub>-1</sub> | 4.28×10 <sup>17</sup>          | -1.94 | 2592  |
|    | C(OOH)C(O•)CC → C=O + CCC=O + •OH                                     |                  |                  | k <sub>2</sub>  | 8.69×10 <sup>21</sup>          | -2.37 | 12629 |
| 8  | CC(OO•)C(OH)CC → CC(OOH)C(O•)CC                                       | t                | t                | k <sub>1</sub>  | 1.80×10 <sup>11</sup>          | 0.10  | 20330 |
|    | CC(OOH)C(O•)CC → CC(OO•)C(OH)CC                                       |                  |                  | k <sub>-1</sub> | 1.22×10 <sup>17</sup>          | -1.71 | 1679  |
|    | CC(OOH)C(O•)CC → CC=O + CCC=O + •OH                                   |                  |                  | k <sub>2</sub>  | 4.72×10 <sup>20</sup>          | -2.06 | 9465  |
| 9  | C <sub>2</sub> C(OO•)C(OH)CC → C <sub>2</sub> C(OOH)C(O•)CC           | q                | t                | k <sub>1</sub>  | 3.42×10 <sup>12</sup>          | -0.22 | 20842 |
|    | C <sub>2</sub> C(OOH)C(O•)CC → C <sub>2</sub> C(OO•)C(OH)CC           |                  |                  | k <sub>-1</sub> | 4.39×10 <sup>18</sup>          | -2.18 | 1440  |
|    | C <sub>2</sub> C(OOH)C(O•)CC → C <sub>2</sub> C=O + CCC=O + •OH       |                  |                  | k <sub>2</sub>  | 1.69×10 <sup>23</sup>          | -2.87 | 7744  |
| 32 | C(OO•)C(OH)C <sub>2</sub> → C(OOH)C(O•)C <sub>2</sub>                 | s                | q                | k <sub>1</sub>  | 2.14×10 <sup>13</sup>          | -0.62 | 22228 |
|    | C(OOH)CO• → C(OO•)C(OH)C <sub>2</sub>                                 |                  |                  | k <sub>-1</sub> | 7.98×10 <sup>18</sup>          | -2.15 | 3826  |
|    | C(OOH)C(O•)C <sub>2</sub> → C=O + C <sub>2</sub> C=O + •OH            |                  |                  | k <sub>2</sub>  | 7.91×10 <sup>22</sup>          | -2.61 | 12398 |
| 33 | CC(OO•)C(OH)C <sub>2</sub> → CC(OOH)C(O•)C <sub>2</sub>               | t                | q                | k <sub>1</sub>  | 1.33×10 <sup>11</sup>          | 0.05  | 20310 |
|    | CC(OOH)C(O•)C <sub>2</sub> → CC(OO•)C(OH)C <sub>2</sub>               |                  |                  | k <sub>-1</sub> | 5.80×10 <sup>18</sup>          | -2.08 | 2899  |
|    | CC(OOH)C(O•)C <sub>2</sub> → CC=O + C <sub>2</sub> C=O + •OH          |                  |                  | k <sub>2</sub>  | 3.43×10 <sup>22</sup>          | -2.55 | 10499 |
| 34 | C <sub>2</sub> C(OO•)C(OH)C <sub>2</sub> → 2 C <sub>2</sub> C=O + •OH | q                | q                | k <sub>1</sub>  | 4.58×10 <sup>14</sup>          | -0.82 | 22410 |

**S4) Internal rotation potentials for the R12 radical  $[(\text{CH}_3)_2\text{-C}(\text{OO}\cdot)\text{-C}(\text{OH})\text{-CH}(\text{CH}_3)_2]$  calculated at B3LYP/6-311G(d,p) level**

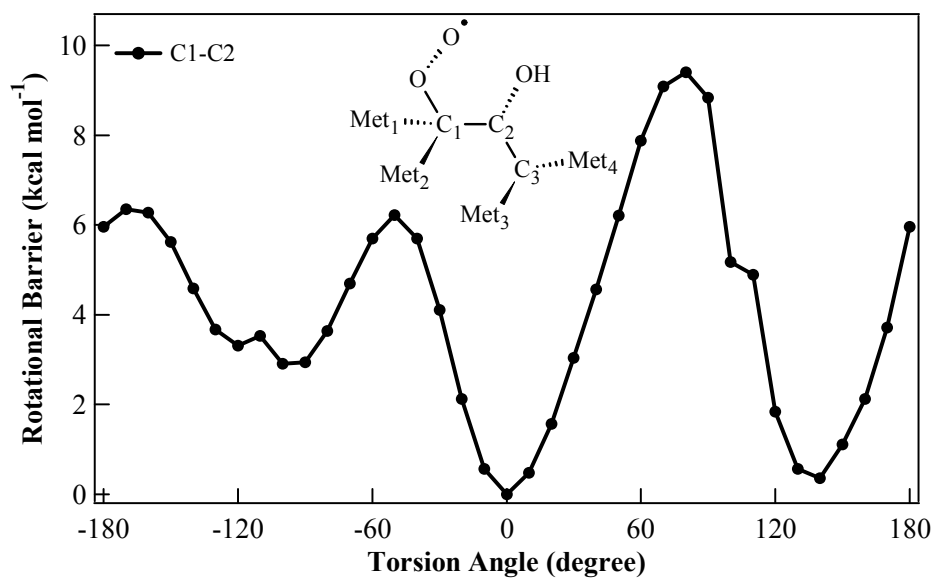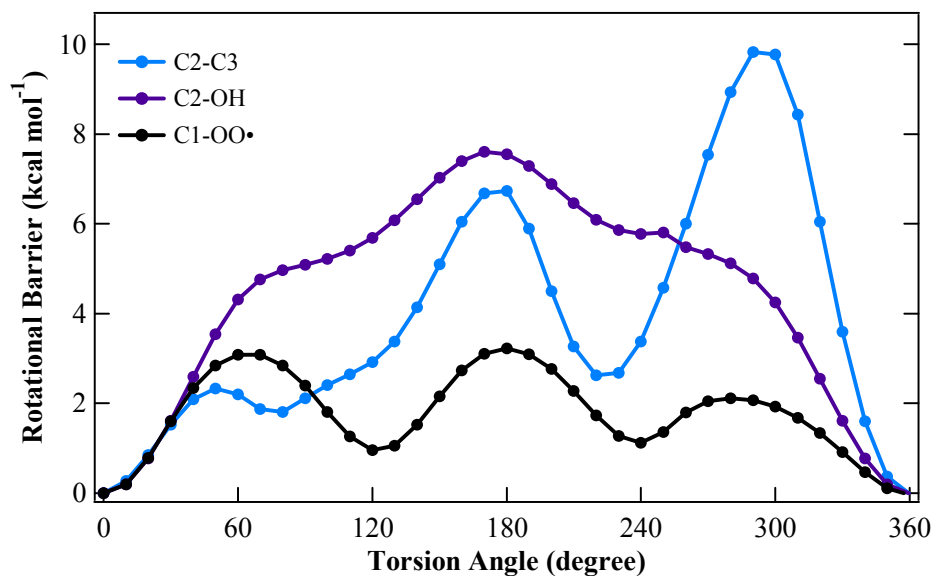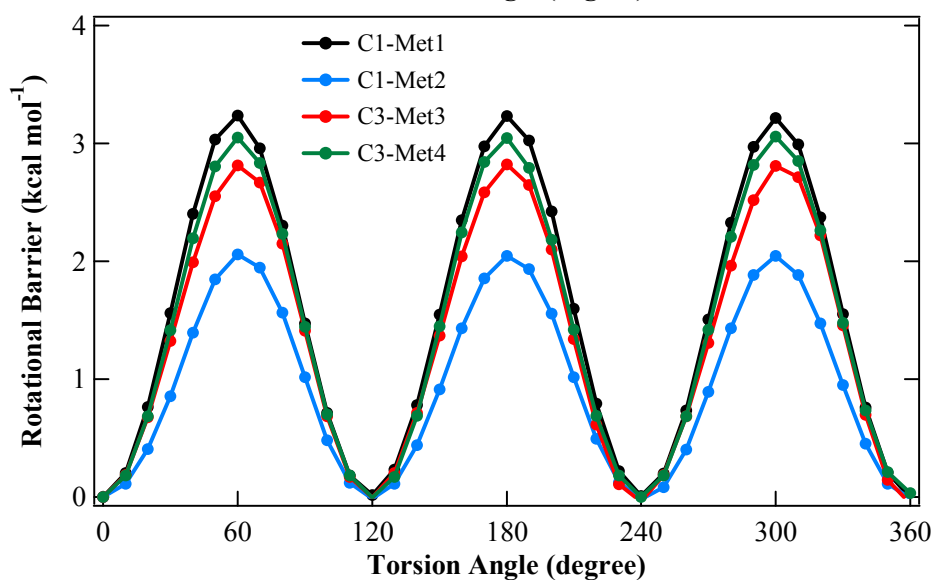

**S5) Modified Arrhenius Fits of the unimolecular reactions of  $\beta$ -HOROO• and HOQ•OOH radicals related to reference TS**

| <b>Reaction class: 1,4 H-shift of <math>\beta</math>-HOROO• radicals</b>            |                                             |                        |      |       |
|-------------------------------------------------------------------------------------|---------------------------------------------|------------------------|------|-------|
| <b>Reference TS group1</b>                                                          | TS-substitution                             | $k = AT^n \exp(-E/RT)$ |      |       |
|                                                                                     |                                             | A                      | n    | E     |
| 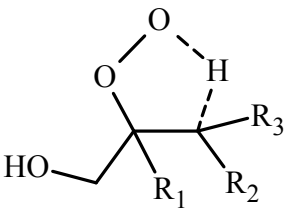   | $R_1, R_2, R_3 = H$                         | $1.35 \times 10^{-3}$  | 4.55 | 26985 |
|                                                                                     | $R_1 = \text{Alkyl radical}; R_2, R_3 = H$  | $9.48 \times 10^{-1}$  | 3.73 | 26469 |
|                                                                                     | $R_1, R_3 = H; R_2 = \text{Alkyl radical}$  | $2.77 \times 10^{-1}$  | 3.77 | 23992 |
|                                                                                     | $R_1, R_2 = \text{Alkyl radical}; R_3 = H$  | $1.43 \times 10^3$     | 2.76 | 24752 |
|                                                                                     | $R_1 = H; R_2, R_3 = \text{Alkyl radical};$ | $1.52 \times 10^3$     | 2.64 | 22082 |
|                                                                                     | $R_1, R_2, R_3 = \text{Alkyl radical}$      | $6.12 \times 10^3$     | 2.47 | 21089 |
| <b>Reference TS Group2</b>                                                          | TS-substitution                             | $k = AT^n \exp(-E/RT)$ |      |       |
|  | $R_1, R_2, R_3 = H$                         | $9.28 \times 10^3$     | 2.46 | 21874 |
|                                                                                     | $R_1 = \text{Alkyl radical}; R_2, R_3 = H$  | $1.76 \times 10^3$     | 2.69 | 21498 |
|                                                                                     | $R_1, R_2 = \text{Alkyl radical}; R_3 = H$  | $1.19 \times 10^6$     | 1.94 | 22661 |
|                                                                                     | $R_1, R_2 = H; R_3 = \text{Alkyl radical}$  | $1.92 \times 10^5$     | 2.03 | 20190 |
|                                                                                     | $R_1, R_3 = \text{Alkyl radical}; R_2 = H$  | $2.85 \times 10^5$     | 2.00 | 19560 |
|                                                                                     | $R_1, R_2, R_3 = \text{Alkyl radical}$      | $3.01 \times 10^6$     | 1.75 | 20103 |

| Reaction class: 1,5 H-shift of $\beta$ -HOROO• radicals                             |                                                 |                        |      |       |
|-------------------------------------------------------------------------------------|-------------------------------------------------|------------------------|------|-------|
| Reference TS<br>Group1                                                              | TS-substitution                                 | $k = AT^n \exp(-E/RT)$ |      |       |
|                                                                                     |                                                 | A                      | n    | E     |
| 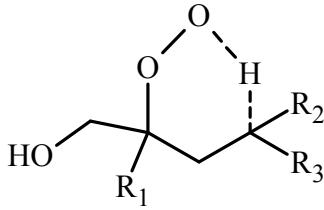   | $R_1, R_2, R_3 = H$                             | $6.23 \times 10^3$     | 2.35 | 18430 |
|                                                                                     | $R_1 = \text{Alkyl radical}; R_2, R_3 = H$      | $1.04 \times 10^6$     | 1.78 | 19403 |
|                                                                                     | $R_1, R_3 = H; R_2 = \text{Alkyl radical}$      | $7.15 \times 10^5$     | 1.67 | 16221 |
|                                                                                     | $R_1, R_2 = \text{Alkyl radical}; R_3 = H$      | $2.04 \times 10^7$     | 1.21 | 16239 |
|                                                                                     | $R_1 = H; R_2, R_3 = \text{Alkyl radical};$     | $4.77 \times 10^6$     | 1.35 | 13588 |
|                                                                                     | $R_1, R_2, R_3 = \text{Alkyl radical}$          | $1.39 \times 10^6$     | 1.51 | 12811 |
| Reference TS<br>Group2                                                              | TS-substitution                                 | $k = AT^n \exp(-E/RT)$ |      |       |
|                                                                                     |                                                 | A                      | n    | E     |
|  | $R_1, R_2, R_3, R_4 = H$                        | $1.53 \times 10^5$     | 2.05 | 20330 |
|                                                                                     | $R_1 = \text{Alkyl radical}; R_2, R_3, R_4 = H$ | $4.12 \times 10^4$     | 2.20 | 19784 |
|                                                                                     | $R_1, R_2 = \text{Alkyl radical}; R_3, R_4 = H$ | $2.22 \times 10^6$     | 1.81 | 21013 |
|                                                                                     | $R_1, R_2, R_4 = H; R_3 = \text{Alkyl radical}$ | $5.76 \times 10^6$     | 1.54 | 17944 |
|                                                                                     | $R_1, R_3 = \text{Alkyl radical}; R_2, R_4 = H$ | $2.34 \times 10^7$     | 1.41 | 17829 |
|                                                                                     | $R_1, R_2, R_3 = \text{Alkyl radical}; R_4 = H$ | $2.27 \times 10^9$     | 0.83 | 18664 |
|                                                                                     | $R_1, R_2 = H; R_3, R_4 = \text{Alkyl radical}$ | $3.86 \times 10^7$     | 1.21 | 15665 |
|                                                                                     | $R_1, R_3, R_4 = \text{Alkyl radical}; R_2 = H$ | $4.42 \times 10^8$     | 0.97 | 15399 |
|                                                                                     | $R_1, R_2, R_3, R_4 = \text{Alkyl radical}$     | $3.92 \times 10^{11}$  | 0.17 | 16655 |

| Reaction class: 1,6 H-shift of $\beta$ -HOROO• radicals                             |                                                                                      |                                |       |       |
|-------------------------------------------------------------------------------------|--------------------------------------------------------------------------------------|--------------------------------|-------|-------|
| Reference TS<br>Group1                                                              | TS-substitution                                                                      | k = AT <sup>n</sup> exp(-E/RT) |       |       |
|                                                                                     |                                                                                      | A                              | n     | E     |
| 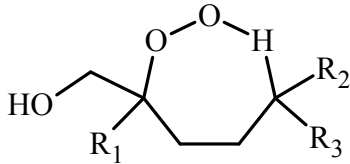   | R <sub>1</sub> , R <sub>2</sub> , R <sub>3</sub> = H                                 | 2.29×10 <sup>2</sup>           | 2.53  | 17005 |
|                                                                                     | R <sub>1</sub> = Alkyl radical; R <sub>2</sub> , R <sub>3</sub> = H                  | 2.13×10 <sup>6</sup>           | 1.38  | 18485 |
|                                                                                     | R <sub>1</sub> , R <sub>3</sub> = H; R <sub>2</sub> = Alkyl radical                  | 8.68×10 <sup>2</sup>           | 2.31  | 13600 |
|                                                                                     | R <sub>1</sub> , R <sub>2</sub> = Alkyl radical; R <sub>3</sub> = H                  | 6.09×10 <sup>6</sup>           | 1.20  | 15177 |
|                                                                                     | R <sub>1</sub> = H; R <sub>2</sub> , R <sub>3</sub> = Alkyl radical;                 | 2.72×10 <sup>3</sup>           | 2.16  | 11165 |
|                                                                                     | R <sub>1</sub> , R <sub>2</sub> , R <sub>3</sub> = Alkyl radical                     | 7.49×10 <sup>7</sup>           | 0.83  | 12793 |
| Reference TS<br>Group2                                                              | TS-substitution                                                                      | k = AT <sup>n</sup> exp(-E/RT) |       |       |
|                                                                                     |                                                                                      | A                              | n     | E     |
|  | R <sub>1</sub> , R <sub>2</sub> , R <sub>3</sub> , R <sub>4</sub> = H                | 8.48×10 <sup>5</sup>           | 1.59  | 19515 |
|                                                                                     | R <sub>1</sub> = Alkyl radical; R <sub>2</sub> , R <sub>3</sub> , R <sub>4</sub> = H | 7.43×10 <sup>6</sup>           | 1.34  | 20054 |
|                                                                                     | R <sub>1</sub> , R <sub>2</sub> = Alkyl radical; R <sub>3</sub> , R <sub>4</sub> = H | 1.82×10 <sup>9</sup>           | 0.68  | 20655 |
|                                                                                     | R <sub>1</sub> , R <sub>2</sub> , R <sub>4</sub> = H; R <sub>3</sub> = Alkyl radical | 8.36×10 <sup>6</sup>           | 1.26  | 16333 |
|                                                                                     | R <sub>1</sub> , R <sub>3</sub> = Alkyl radical; R <sub>2</sub> , R <sub>4</sub> = H | 2.64×10 <sup>7</sup>           | 1.16  | 16609 |
|                                                                                     | R <sub>1</sub> , R <sub>2</sub> , R <sub>3</sub> = Alkyl radical; R <sub>4</sub> = H | 2.44×10 <sup>9</sup>           | 0.62  | 17748 |
|                                                                                     | R <sub>1</sub> , R <sub>2</sub> = H; R <sub>3</sub> , R <sub>4</sub> = Alkyl radical | 4.56×10 <sup>9</sup>           | 0.40  | 14918 |
|                                                                                     | R <sub>1</sub> , R <sub>3</sub> , R <sub>4</sub> = Alkyl radical; R <sub>2</sub> = H | 5.25×10 <sup>10</sup>          | 0.10  | 15442 |
|                                                                                     | R <sub>1</sub> , R <sub>2</sub> , R <sub>3</sub> , R <sub>4</sub> = Alkyl radical    | 4.13×10 <sup>12</sup>          | -0.39 | 16335 |

| Reaction class: HO <sub>2</sub> • elimination from β-HOROO• radicals                |                                                                      |                                |       |       |
|-------------------------------------------------------------------------------------|----------------------------------------------------------------------|--------------------------------|-------|-------|
| Reference TS<br>Group1                                                              | TS-substitution                                                      | k = AT <sup>n</sup> exp(-E/RT) |       |       |
|                                                                                     |                                                                      | A                              | n     | E     |
| 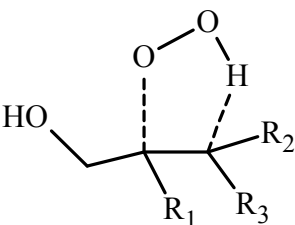   | R <sub>1</sub> , R <sub>2</sub> , R <sub>3</sub> = H                 | 3.86×10 <sup>7</sup>           | 1.48  | 29631 |
|                                                                                     | R <sub>1</sub> = Alkyl radical; R <sub>2</sub> , R <sub>3</sub> = H  | 3.03×10 <sup>9</sup>           | 1.22  | 29419 |
|                                                                                     | R <sub>1</sub> , R <sub>3</sub> = H; R <sub>2</sub> = Alkyl radical  | 3.15×10 <sup>7</sup>           | 1.58  | 28744 |
|                                                                                     | R <sub>1</sub> , R <sub>2</sub> = Alkyl radical; R <sub>3</sub> = H  | 3.89×10 <sup>9</sup>           | 1.07  | 29027 |
|                                                                                     | R <sub>1</sub> = H; R <sub>2</sub> , R <sub>3</sub> = Alkyl radical; | 6.96×10 <sup>7</sup>           | 1.49  | 28328 |
|                                                                                     | R <sub>1</sub> , R <sub>2</sub> , R <sub>3</sub> = Alkyl radical     | 2.38×10 <sup>11</sup>          | 0.59  | 29894 |
| Reference TS<br>Group2                                                              | TS-substitution                                                      | k = AT <sup>n</sup> exp(-E/RT) |       |       |
|                                                                                     |                                                                      | A                              | n     | E     |
|  | R <sub>1</sub> , R <sub>2</sub> , R <sub>3</sub> = H                 | 1.49×10 <sup>13</sup>          | 0.03  | 33209 |
|                                                                                     | R <sub>1</sub> = Alkyl radical; R <sub>2</sub> , R <sub>3</sub> = H  | 2.07×10 <sup>13</sup>          | 0.00  | 32999 |
|                                                                                     | R <sub>1</sub> , R <sub>2</sub> = Alkyl radical; R <sub>3</sub> = H  | 2.26×10 <sup>16</sup>          | -0.82 | 33642 |
|                                                                                     | R <sub>1</sub> , R <sub>2</sub> = H; R <sub>3</sub> = Alkyl radical  | 3.65×10 <sup>13</sup>          | -0.15 | 34790 |
|                                                                                     | R <sub>1</sub> , R <sub>3</sub> = Alkyl radical; R <sub>2</sub> = H  | 6.12×10 <sup>14</sup>          | -0.47 | 34516 |
|                                                                                     | R <sub>1</sub> , R <sub>2</sub> , R <sub>3</sub> = Alkyl radical     | 1.01×10 <sup>17</sup>          | -1.01 | 35174 |

| <b>Reaction class: cyclic ether formation from <math>\beta</math>-, <math>\gamma</math>-, and <math>\delta</math>-HOQ•OOH radicals from group 1</b> |                                             |                        |       |       |
|-----------------------------------------------------------------------------------------------------------------------------------------------------|---------------------------------------------|------------------------|-------|-------|
| <b>Reference TS</b><br><b>Hydroxy-oxirane</b>                                                                                                       | TS-substitution                             | $k = AT^n \exp(-E/RT)$ |       |       |
|                                                                                                                                                     |                                             | A                      | n     | E     |
| 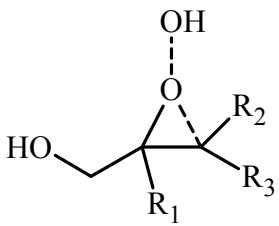                                                                   | $R_1, R_2, R_3 = H$                         | $2.26 \times 10^{10}$  | 0.56  | 10498 |
|                                                                                                                                                     | $R_1 = \text{Alkyl radical}; R_2, R_3 = H$  | $4.31 \times 10^{11}$  | 0.10  | 9747  |
|                                                                                                                                                     | $R_1, R_3 = H; R_2 = \text{Alkyl radical}$  | $2.76 \times 10^9$     | 1.01  | 8031  |
|                                                                                                                                                     | $R_1, R_2 = \text{Alkyl radical}; R_3 = H$  | $2.70 \times 10^{11}$  | 0.11  | 7546  |
|                                                                                                                                                     | $R_1 = H; R_2, R_3 = \text{Alkyl radical};$ | $7.46 \times 10^{10}$  | 0.18  | 7515  |
|                                                                                                                                                     | $R_1, R_2, R_3 = \text{Alkyl radical}$      | $8.35 \times 10^9$     | 0.51  | 7153  |
| <b>Reference TS</b><br><b>Hydroxy-oxetane</b>                                                                                                       | TS-substitution                             | $k = AT^n \exp(-E/RT)$ |       |       |
|                                                                                                                                                     |                                             | A                      | n     | E     |
|                                                                  | $R_1, R_2, R_3 = H$                         | $1.67 \times 10^{11}$  | -0.09 | 16142 |
|                                                                                                                                                     | $R_1 = \text{Alkyl radical}; R_2, R_3 = H$  | $3.75 \times 10^{10}$  | 0.13  | 13486 |
|                                                                                                                                                     | $R_1, R_3 = H; R_2 = \text{Alkyl radical}$  | $2.44 \times 10^{11}$  | -0.08 | 12763 |
|                                                                                                                                                     | $R_1, R_2 = \text{Alkyl radical}; R_3 = H$  | $1.13 \times 10^{11}$  | 0.01  | 12001 |
|                                                                                                                                                     | $R_1 = H; R_2, R_3 = \text{Alkyl radical};$ | $8.09 \times 10^{10}$  | 0.08  | 11242 |
|                                                                                                                                                     | $R_1, R_2, R_3 = \text{Alkyl radical}$      | $9.77 \times 10^{10}$  | 0.17  | 10400 |
| <b>Reference TS</b><br><b>Hydroxy-oxolane</b>                                                                                                       | TS-substitution                             | $k = AT^n \exp(-E/RT)$ |       |       |
|                                                                                                                                                     |                                             | A                      | n     | E     |
|                                                                  | $R_1, R_2, R_3 = H$                         | $5.02 \times 10^{12}$  | -0.77 | 10632 |
|                                                                                                                                                     | $R_1 = \text{Alkyl radical}; R_2, R_3 = H$  | $4.00 \times 10^{12}$  | -0.64 | 9932  |
|                                                                                                                                                     | $R_1, R_3 = H; R_2 = \text{Alkyl radical}$  | $7.59 \times 10^{13}$  | -1.08 | 9093  |
|                                                                                                                                                     | $R_1, R_2 = \text{Alkyl radical}; R_3 = H$  | $5.01 \times 10^{14}$  | -1.30 | 8933  |
|                                                                                                                                                     | $R_1 = H; R_2, R_3 = \text{Alkyl radical};$ | $1.55 \times 10^{15}$  | -1.42 | 7888  |
|                                                                                                                                                     | $R_1, R_2, R_3 = \text{Alkyl radical}$      | $1.21 \times 10^{17}$  | -1.92 | 8510  |



| Reaction class: cyclic ether formation from $\beta$ -, $\gamma$ -, and $\delta$ -HOQ•OOH radicals from group 2 |                                                 |                        |       |       |
|----------------------------------------------------------------------------------------------------------------|-------------------------------------------------|------------------------|-------|-------|
| Reference TS<br>Hydroxy-oxirane                                                                                | TS-substitution                                 | $k = AT^n \exp(-E/RT)$ |       |       |
|                                                                                                                |                                                 | A                      | A     | A     |
|                                                                                                                | $R_1, R_2, R_3 = H$                             | $3.11 \times 10^{12}$  | 0.06  | 11161 |
|                                                                                                                | $R_1 = \text{Alkyl radical}; R_2, R_3 = H$      | $3.90 \times 10^{12}$  | 0.02  | 9532  |
|                                                                                                                | $R_1, R_2 = \text{Alkyl radical}; R_3 = H$      | $9.88 \times 10^{11}$  | 0.15  | 7890  |
|                                                                                                                | $R_1, R_2 = H; R_3 = \text{Alkyl radical}$      | $8.62 \times 10^{10}$  | 0.56  | 9184  |
|                                                                                                                | $R_1, R_3 = \text{Alkyl radical}; R_2 = H$      | $7.44 \times 10^{10}$  | 0.58  | 7568  |
|                                                                                                                | $R_1, R_2, R_3 = \text{Alkyl radical}$          | $5.56 \times 10^{13}$  | -0.32 | 7804  |
| Reference TS<br>Hydroxy-oxetane                                                                                | TS-substitution                                 | $k = AT^n \exp(-E/RT)$ |       |       |
|                                                                                                                |                                                 | A                      | A     | A     |
|                                                                                                                | $R_1, R_2, R_3, R_4 = H$                        | $2.31 \times 10^{15}$  | -1.08 | 21617 |
|                                                                                                                | $R_1 = \text{Alkyl radical}; R_2, R_3, R_4 = H$ | $1.00 \times 10^{16}$  | -1.33 | 19882 |
|                                                                                                                | $R_1, R_2 = \text{Alkyl radical}; R_3, R_4 = H$ | $5.03 \times 10^{15}$  | -1.21 | 19263 |
|                                                                                                                | $R_1, R_2, R_4 = H; R_3 = \text{Alkyl radical}$ | $6.83 \times 10^{13}$  | -0.59 | 18410 |
|                                                                                                                | $R_1, R_3 = \text{Alkyl radical}; R_2, R_4 = H$ | $2.18 \times 10^{14}$  | -0.76 | 17066 |
|                                                                                                                | $R_1, R_2, R_3 = \text{Alkyl radical}; R_4 = H$ | $3.69 \times 10^{14}$  | -0.78 | 16261 |
|                                                                                                                | $R_1, R_2 = H; R_3, R_4 = \text{Alkyl radical}$ | $1.55 \times 10^{15}$  | -0.88 | 16666 |
|                                                                                                                | $R_1, R_3, R_4 = \text{Alkyl radical}; R_2 = H$ | $1.95 \times 10^{15}$  | -0.88 | 15839 |
|                                                                                                                | $R_1, R_2, R_3, R_4 = \text{Alkyl radical}$     | $3.09 \times 10^{17}$  | -1.56 | 16115 |
| Reference TS<br>Hydroxy-oxolane                                                                                | TS-substitution                                 | $k = AT^n \exp(-E/RT)$ |       |       |
|                                                                                                                |                                                 | A                      | n     | E     |
|                                                                                                                | $R_1, R_2, R_3, R_4 = H$                        | $1.93 \times 10^{12}$  | -0.42 | 12689 |
|                                                                                                                | $R_1 = \text{Alkyl radical}; R_2, R_3, R_4 = H$ | $7.31 \times 10^{11}$  | -0.31 | 12455 |
|                                                                                                                | $R_1, R_2 = \text{Alkyl radical}; R_3, R_4 = H$ | $1.02 \times 10^{15}$  | -1.25 | 14452 |
|                                                                                                                | $R_1, R_2, R_4 = H; R_3 = \text{Alkyl radical}$ | $1.90 \times 10^{10}$  | 0.05  | 10767 |
|                                                                                                                | $R_1, R_3 = \text{Alkyl radical}; R_2, R_4 = H$ | $3.89 \times 10^{11}$  | -0.29 | 10716 |
|                                                                                                                | $R_1, R_2, R_3 = \text{Alkyl radical}; R_4 = H$ | $1.62 \times 10^{13}$  | -0.76 | 12015 |
|                                                                                                                | $R_1, R_2 = H; R_3, R_4 = \text{Alkyl radical}$ | $3.17 \times 10^{10}$  | 0.03  | 9292  |
|                                                                                                                | $R_1, R_3, R_4 = \text{Alkyl radical}; R_2 = H$ | $2.09 \times 10^{11}$  | -0.18 | 9249  |
|                                                                                                                | $R_1, R_2, R_3, R_4 = \text{Alkyl radical}$     | $1.25 \times 10^{12}$  | -0.52 | 8175  |

| Reaction class: $\beta$ -scission of $\beta$ -HOQ•OOH radicals                      |                                             |                        |       |       |
|-------------------------------------------------------------------------------------|---------------------------------------------|------------------------|-------|-------|
| Reference TS group1                                                                 | TS-substitution                             | $k = AT^n \exp(-E/RT)$ |       |       |
|                                                                                     |                                             | A                      | n     | E     |
| 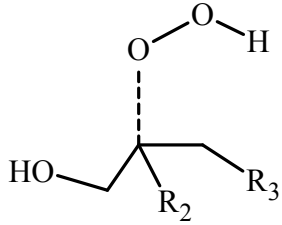   | $R_1, R_2, R_3 = H$                         | $8.17 \times 10^9$     | 0.80  | 14231 |
|                                                                                     | $R_1 = \text{Alkyl radical}; R_2, R_3 = H$  | $5.06 \times 10^{10}$  | 0.54  | 13832 |
|                                                                                     | $R_1, R_3 = H; R_2 = \text{Alkyl radical}$  | $1.97 \times 10^{10}$  | 0.74  | 14280 |
|                                                                                     | $R_1, R_2 = \text{Alkyl radical}; R_3 = H$  | $1.00 \times 10^{11}$  | 0.48  | 13393 |
|                                                                                     | $R_1 = H; R_2, R_3 = \text{Alkyl radical};$ | $2.26 \times 10^{11}$  | 0.43  | 13893 |
|                                                                                     | $R_1, R_2, R_3 = \text{Alkyl radical}$      | $2.66 \times 10^{11}$  | 0.45  | 13755 |
| Reference TS Group2                                                                 | TS-substitution                             | $k = AT^n \exp(-E/RT)$ |       |       |
|  | $R_1, R_2, R_3 = H$                         | $3.25 \times 10^{12}$  | 0.33  | 15980 |
|                                                                                     | $R_1 = \text{Alkyl radical}; R_2, R_3 = H$  | $5.22 \times 10^{14}$  | -0.24 | 16658 |
|                                                                                     | $R_1, R_2 = \text{Alkyl radical}; R_3 = H$  | $6.39 \times 10^{14}$  | -0.35 | 16490 |
|                                                                                     | $R_1, R_2 = H; R_3 = \text{Alkyl radical}$  | $5.46 \times 10^{10}$  | 0.92  | 14881 |
|                                                                                     | $R_1, R_3 = \text{Alkyl radical}; R_2 = H$  | $1.22 \times 10^{13}$  | 0.24  | 15271 |
|                                                                                     | $R_1, R_2, R_3 = \text{Alkyl radical}$      | $2.23 \times 10^{14}$  | -0.18 | 16442 |

| <b>Reaction class: substitution of H-atoms by alkyl groups in the cyclic part of transition states involved in the 1,5 H-shift of <math>\beta</math>-HOROO• radicals - Group 1</b> |                                                       |                        |      |       |
|------------------------------------------------------------------------------------------------------------------------------------------------------------------------------------|-------------------------------------------------------|------------------------|------|-------|
| <b>Reference TS<br/>Without substitution</b>                                                                                                                                       | TS-substitution                                       | $k = AT^n \exp(-E/RT)$ |      |       |
|                                                                                                                                                                                    |                                                       | A                      | n    | E     |
| 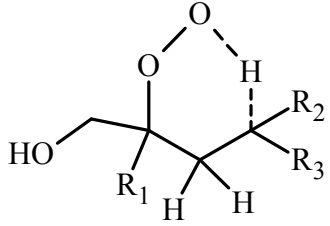                                                                                                  | $R_1, R_2, R_3 = H$                                   | $6.23 \times 10^3$     | 2.35 | 18430 |
|                                                                                                                                                                                    | $R_1 = \text{Alkyl radical}; R_2, R_3 = H$            | $1.04 \times 10^6$     | 1.78 | 19403 |
|                                                                                                                                                                                    | $R_1, R_3 = H; R_2 = \text{Alkyl radical}$            | $7.15 \times 10^5$     | 1.67 | 16221 |
|                                                                                                                                                                                    | $R_1, R_2 = \text{Alkyl radical}; R_3 = H$            | $2.04 \times 10^7$     | 1.21 | 16239 |
|                                                                                                                                                                                    | $R_1 = H; R_2, R_3 = \text{Alkyl radical};$           | $4.77 \times 10^6$     | 1.35 | 13588 |
|                                                                                                                                                                                    | $R_1, R_2, R_3 = \text{Alkyl radical}$                | $1.39 \times 10^6$     | 1.51 | 12811 |
| <b>Reference TS<br/>First substitution</b>                                                                                                                                         | TS-substitution                                       | $k = AT^n \exp(-E/RT)$ |      |       |
|                                                                                                 | $R_1, R_2, R_3 = H; R_4 = \text{Alkyl radical}$       | $3.10 \times 10^5$     | 1.84 | 19281 |
|                                                                                                                                                                                    | $R_1, R_4 = \text{Alkyl radical}; R_2, R_3 = H$       | $2.67 \times 10^6$     | 1.70 | 18609 |
|                                                                                                                                                                                    | $R_1, R_3 = H; R_2, R_4 = \text{Alkyl radical}$       | $2.07 \times 10^4$     | 2.06 | 14389 |
|                                                                                                                                                                                    | $R_1, R_2, R_4 = \text{Alkyl radical}; R_3 = H$       | $2.44 \times 10^5$     | 1.78 | 13844 |
|                                                                                                                                                                                    | $R_1 = H; R_2, R_3, R_4 = \text{Alkyl radical};$      | $1.56 \times 10^6$     | 1.50 | 13053 |
|                                                                                                                                                                                    | $R_1, R_2, R_3, R_4 = \text{Alkyl radical}$           | $1.35 \times 10^8$     | 1.06 | 12964 |
| <b>Reference TS<br/>Second substitution</b>                                                                                                                                        | TS-substitution                                       | $k = AT^n \exp(-E/RT)$ |      |       |
|                                                                                                 | $R_1, R_2, R_3 = H; R_4, R_5 = \text{Alkyl radical}$  | $3.66 \times 10^6$     | 1.69 | 19284 |
|                                                                                                                                                                                    | $R_1, R_4, R_5 = \text{Alkyl radical}; R_2, R_3 = H$  | $2.67 \times 10^6$     | 1.70 | 18609 |
|                                                                                                                                                                                    | $R_1, R_3 = H; R_2, R_4, R_5 = \text{Alkyl radical}$  | $3.72 \times 10^4$     | 2.09 | 14706 |
|                                                                                                                                                                                    | $R_1, R_2, R_4, R_5 = \text{Alkyl radical}; R_3 = H$  | $2.37 \times 10^6$     | 1.69 | 14313 |
|                                                                                                                                                                                    | $R_1 = H; R_2, R_3, R_4, R_5 = \text{Alkyl radical};$ | $3.21 \times 10^6$     | 1.48 | 12509 |
|                                                                                                                                                                                    | $R_1, R_2, R_3, R_4, R_5 = \text{Alkyl radical}$      | $5.31 \times 10^7$     | 1.14 | 11632 |

**Reaction class: substitution of H-atoms by alkyl groups in the cyclic part of transition states involved in the 1,5 H-shift of  $\beta$ -HOROO• radicals - Group 2**

| Reference TS<br>Without substitution                                                | TS-substitution                                                                                       | k = AT <sup>n</sup> exp(-E/RT) |      |       |
|-------------------------------------------------------------------------------------|-------------------------------------------------------------------------------------------------------|--------------------------------|------|-------|
|                                                                                     |                                                                                                       | A                              | n    | E     |
| 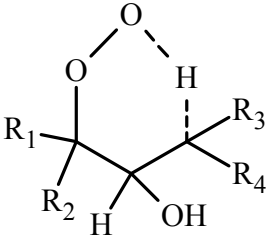   | R <sub>1</sub> , R <sub>2</sub> , R <sub>3</sub> , R <sub>4</sub> = H                                 | 1.53×10 <sup>5</sup>           | 2.05 | 20330 |
|                                                                                     | R <sub>1</sub> = Alkyl radical; R <sub>2</sub> , R <sub>3</sub> , R <sub>4</sub> = H                  | 4.12×10 <sup>4</sup>           | 2.20 | 19784 |
|                                                                                     | R <sub>1</sub> , R <sub>2</sub> = Alkyl radical; R <sub>3</sub> , R <sub>4</sub> = H                  | 2.22×10 <sup>6</sup>           | 1.81 | 21013 |
|                                                                                     | R <sub>1</sub> , R <sub>2</sub> , R <sub>4</sub> = H; R <sub>3</sub> = Alkyl radical                  | 5.76×10 <sup>6</sup>           | 1.54 | 17944 |
|                                                                                     | R <sub>1</sub> , R <sub>3</sub> = Alkyl radical; R <sub>2</sub> , R <sub>4</sub> = H                  | 2.34×10 <sup>7</sup>           | 1.41 | 17829 |
|                                                                                     | R <sub>1</sub> , R <sub>2</sub> , R <sub>3</sub> = Alkyl radical; R <sub>4</sub> = H                  | 2.27×10 <sup>9</sup>           | 0.83 | 18664 |
|                                                                                     | R <sub>1</sub> , R <sub>2</sub> = H; R <sub>3</sub> , R <sub>4</sub> = Alkyl radical                  | 3.86×10 <sup>7</sup>           | 1.21 | 15665 |
|                                                                                     | R <sub>1</sub> , R <sub>3</sub> , R <sub>4</sub> = Alkyl radical; R <sub>2</sub> = H                  | 4.42×10 <sup>8</sup>           | 0.97 | 15399 |
|                                                                                     | R <sub>1</sub> , R <sub>2</sub> , R <sub>3</sub> , R <sub>4</sub> = Alkyl radical                     | 3.92×10 <sup>11</sup>          | 0.17 | 16655 |
| Reference TS<br>With substitution                                                   | TS-substitution                                                                                       | k = AT <sup>n</sup> exp(-E/RT) |      |       |
|                                                                                     |                                                                                                       | A                              | n    | E     |
|  | R <sub>1</sub> , R <sub>2</sub> , R <sub>3</sub> , R <sub>4</sub> = H; R <sub>5</sub> = Alkyl radical | 1.01×10 <sup>7</sup>           | 1.46 | 20173 |
|                                                                                     | R <sub>1</sub> , R <sub>5</sub> = Alkyl radical; R <sub>2</sub> , R <sub>3</sub> , R <sub>4</sub> = H | 2.11×10 <sup>5</sup>           | 1.96 | 19816 |
|                                                                                     | R <sub>1</sub> , R <sub>2</sub> , R <sub>5</sub> = Alkyl radical; R <sub>3</sub> , R <sub>4</sub> = H | 7.22×10 <sup>5</sup>           | 1.90 | 19784 |
|                                                                                     | R <sub>1</sub> , R <sub>2</sub> , R <sub>4</sub> = H; R <sub>3</sub> , R <sub>5</sub> = Alkyl radical | 1.66×10 <sup>5</sup>           | 1.87 | 15190 |
|                                                                                     | R <sub>1</sub> , R <sub>3</sub> , R <sub>5</sub> = Alkyl radical; R <sub>2</sub> , R <sub>4</sub> = H | 8.48×10 <sup>4</sup>           | 2.11 | 14922 |
|                                                                                     | R <sub>1</sub> , R <sub>2</sub> , R <sub>3</sub> , R <sub>5</sub> = Alkyl radical; R <sub>4</sub> = H | 1.07×10 <sup>6</sup>           | 1.73 | 15736 |
|                                                                                     | R <sub>1</sub> , R <sub>2</sub> = H; R <sub>3</sub> , R <sub>4</sub> , R <sub>5</sub> = Alkyl radical | 5.42×10 <sup>8</sup>           | 0.78 | 14328 |
|                                                                                     | R <sub>1</sub> , R <sub>3</sub> , R <sub>4</sub> , R <sub>5</sub> = Alkyl radical; R <sub>2</sub> = H | 5.97×10 <sup>7</sup>           | 1.17 | 13441 |
|                                                                                     | R <sub>1</sub> , R <sub>2</sub> , R <sub>3</sub> , R <sub>4</sub> , R <sub>5</sub> = Alkyl radical    | 6.82×10 <sup>5</sup>           | 1.74 | 11660 |

**Reaction class: Waddington mechanism of  $\beta$ -HOROO• radicals**

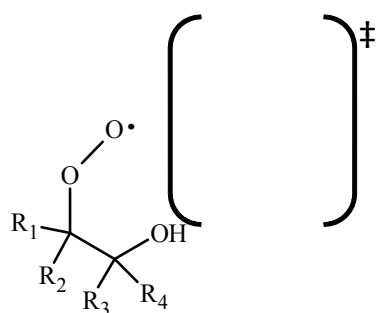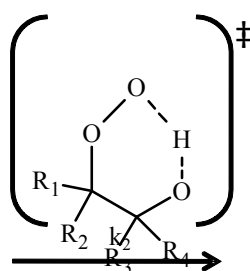

$R_1$

| TS-substitution                                 | Reaction | $k = AT^n \exp(-E/RT)$ |       |       |
|-------------------------------------------------|----------|------------------------|-------|-------|
|                                                 |          | A                      | n     | E     |
| $R_1, R_2, R_3, R_4 = H$                        | $k_1$    | $8.84 \times 10^{10}$  | 0.12  | 21163 |
|                                                 | $k_{-1}$ | $1.28 \times 10^{12}$  | -0.23 | -593  |
|                                                 | $k_2$    | $4.42 \times 10^{15}$  | -0.38 | 9847  |
| $R_1 = \text{Alkyl radical}; R_2, R_3, R_4 = H$ | $k_1$    | $2.61 \times 10^{10}$  | 0.29  | 20378 |
|                                                 | $k_{-1}$ | $8.86 \times 10^{15}$  | -1.36 | 1500  |
|                                                 | $k_2$    | $1.99 \times 10^{19}$  | -1.50 | 10820 |
| $R_1, R_2 = \text{Alkyl radical}; R_3, R_4 = H$ | $k_1$    | $5.75 \times 10^{13}$  | -0.64 | 21610 |
|                                                 | $k_{-1}$ | $1.09 \times 10^{16}$  | -1.41 | 389   |
|                                                 | $k_2$    | $6.35 \times 10^{18}$  | -1.52 | 8047  |
| $R_1, R_2, R_4 = H; R_3 = \text{Alkyl radical}$ | $k_1$    | $1.18 \times 10^{10}$  | 0.39  | 20322 |
|                                                 | $k_{-1}$ | $4.28 \times 10^{17}$  | -1.94 | 2592  |
|                                                 | $k_2$    | $8.69 \times 10^{21}$  | -2.37 | 12629 |
| $R_1, R_3 = \text{Alkyl radical}; R_2, R_4 = H$ | $k_1$    | $1.80 \times 10^{11}$  | 0.10  | 20330 |
|                                                 | $k_{-1}$ | $1.22 \times 10^{17}$  | -1.71 | 1679  |
|                                                 | $k_2$    | $4.72 \times 10^{20}$  | -2.06 | 9465  |
| $R_1, R_2, R_3 = \text{Alkyl radical}; R_4 = H$ | $k_1$    | $3.42 \times 10^{12}$  | -0.22 | 20842 |
|                                                 | $k_{-1}$ | $4.39 \times 10^{18}$  | -2.18 | 1440  |
|                                                 | $k_2$    | $1.69 \times 10^{23}$  | -2.87 | 7744  |
| $R_1, R_2 = H; R_3, R_4 = \text{Alkyl radical}$ | $k_1$    | $2.14 \times 10^{13}$  | -0.62 | 22228 |
|                                                 | $k_{-1}$ | $7.98 \times 10^{18}$  | -2.15 | 3826  |
|                                                 | $k_2$    | $7.91 \times 10^{22}$  | -2.61 | 12398 |
| $R_1, R_3, R_4 = \text{Alkyl radical}; R_2 = H$ | $k_1$    | $1.33 \times 10^{11}$  | 0.05  | 20310 |
|                                                 | $k_{-1}$ | $5.80 \times 10^{18}$  | -2.08 | 2899  |
|                                                 | $k_2$    | $3.43 \times 10^{22}$  | -2.55 | 10499 |
| $R_1, R_2, R_3, R_4 = \text{Alkyl radical}$     | $k_1$    | $4.58 \times 10^{14}$  | -0.82 | 22410 |

## S6) Second order perturbation theory analysis of the Fock matrix in NBO basis

BD: bonding orbital, BD\*: anti-bonding orbital, LP: lone pair (non-bonded orbital),

LP\*: unfilled non-bonded orbital

**Table S6a:** NBO analysis for two transition state involved in the 1,4 H-shift of  $R_2$  and  $R_{19}$  radicals (Fig. 6 of the article).

Only stabilization energy  $E(2)$  greater than 10 kcal/mol are presented in the following Table.

|                                                                                                    | Donor (i)                    | Occupancy     | Acceptor (i)                  | $E(2)^a$<br>kcal/mol | $E(j) - E(i)^b$<br>(a.u.) | $F(i,j)^c$<br>(a.u.) |
|----------------------------------------------------------------------------------------------------|------------------------------|---------------|-------------------------------|----------------------|---------------------------|----------------------|
| 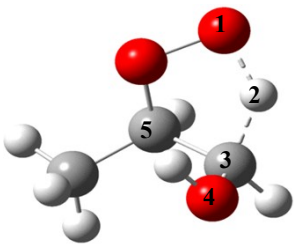<br>TS $R_2$    | $\alpha$ spin orbitals       |               |                               |                      |                           |                      |
|                                                                                                    | LP ( $O_1$ )                 | 0.9020        | BD* ( $H_2 - C_3$ )           | 53.8                 | 0.69                      | 0.244                |
|                                                                                                    | $\beta$ spin orbitals        |               |                               |                      |                           |                      |
|                                                                                                    | BD ( $O_1 - H_2$ )           | 0.8178        | LP* ( $C_3$ )                 | 48.0                 | 0.31                      | 0.168                |
|                                                                                                    | <b>LP (<math>O_4</math>)</b> | <b>0.8514</b> | <b>LP* (<math>C_3</math>)</b> | <b>34.0</b>          | <b>0.24</b>               | <b>0.127</b>         |
| <br>TS $R_{19}$ | $\alpha$ spin orbitals       |               |                               |                      |                           |                      |
|                                                                                                    | LP ( $O_1$ )                 | 0.8888        | BD* ( $H_2 - C_3$ )           | 63.3                 | 0.69                      | 0.244                |
|                                                                                                    | $\beta$ spin orbitals        |               |                               |                      |                           |                      |
|                                                                                                    | BD ( $O_1 - H_2$ )           | 0.7788        | LP* ( $C_3$ )                 | 50.9                 | 0.31                      | 0.168                |

<sup>a</sup>  $E(2)$  stands for the stabilization energy. <sup>b</sup> energy difference between donor and acceptor ( $i_{th}$  and  $j_{th}$  NBO orbitals). <sup>c</sup>  $F(i,j)$  is the Fock matrix element between  $i_{th}$  and  $j_{th}$  NBO orbitals.

**Table S6b:** NBO analysis for two transition states involved in the formation of hydroxyl-oxirane, from  $R_6$  and  $R_{22}$  radicals (Fig. 10 of the article).

Only stabilization energy  $E(2)$  greater than 10 kcal/mol are presented in the following Table.

|                                                                                                                   | Donor (i)                                | Occupancy     | Acceptor (i)                              | $E(2)^a$<br>kcal/mol | $E(j) - E(i)^b$<br>(a.u.) | $F(i,j)^c$<br>(a.u.) |
|-------------------------------------------------------------------------------------------------------------------|------------------------------------------|---------------|-------------------------------------------|----------------------|---------------------------|----------------------|
| 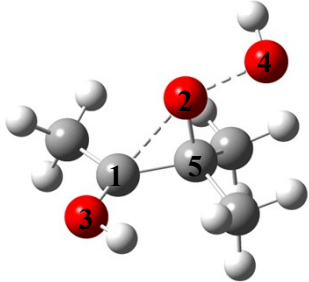 <p>TS <math>R_6</math></p>      | <b><math>\alpha</math> spin orbitals</b> |               |                                           |                      |                           |                      |
|                                                                                                                   | BD (C <sub>1</sub> - O <sub>2</sub> )    | 0.9467        | BD*(C <sub>1</sub> - O <sub>2</sub> )     | 12.2                 | 0.12                      | 0.056                |
|                                                                                                                   | BD (O <sub>2</sub> - C <sub>5</sub> )    | 0.9748        | BD*(C <sub>1</sub> - O <sub>2</sub> )     | 15.6                 | 0.63                      | 0.148                |
|                                                                                                                   | <b>LP (O<sub>3</sub>)</b>                | <b>0.9503</b> | <b>BD*(C<sub>1</sub> - O<sub>2</sub>)</b> | <b>16.8</b>          | <b>0.22</b>               | <b>0.084</b>         |
|                                                                                                                   | LP (O <sub>2</sub> )                     | 0.9929        | BD*(C <sub>1</sub> - O <sub>2</sub> )     | 10.7                 | 0.58                      | 0.118                |
|                                                                                                                   | LP (O <sub>4</sub> )                     | 0.7589        | BD*(C <sub>1</sub> - O <sub>2</sub> )     | 99.9                 | 0.15                      | 0.161                |
|  <p>TS <math>R_{22}</math></p> | <b><math>\alpha</math> spin orbitals</b> |               |                                           |                      |                           |                      |
|                                                                                                                   | BD (C <sub>1</sub> - O <sub>2</sub> )    | 0.9400        | BD*(C <sub>1</sub> - O <sub>2</sub> )     | 13.3                 | 0.14                      | 0.061                |
|                                                                                                                   | BD (O <sub>2</sub> - C <sub>5</sub> )    | 0.9736        | BD*(C <sub>1</sub> - O <sub>2</sub> )     | 16.2                 | 0.65                      | 0.148                |
|                                                                                                                   | LP (O <sub>2</sub> )                     | 0.9934        | BD*(C <sub>1</sub> - O <sub>2</sub> )     | 10.8                 | 0.61                      | 0.119                |
|                                                                                                                   | LP (O <sub>4</sub> )                     | 0.7737        | BD*(C <sub>1</sub> - O <sub>2</sub> )     | 81.0                 | 0.20                      | 0.162                |

<sup>a</sup> $E(2)$  stands for the stabilization energy. <sup>b</sup>Energy difference between donor and acceptor ( $i_{th}$  and  $j_{th}$  NBO orbitals). <sup>c</sup>  $F(i,j)$  is the Fock matrix element between  $i_{th}$  and  $j_{th}$  NBO orbitals.

**Table S6C:** NBO analysis for the three transition states involved in the formation of hydroxyl-oxetane from  $R_4$  and  $R_7$  and  $R_{10}$  radicals (Fig. 19 of the article).

Only stabilization energy  $E(2)$  greater than 5 kcal/mol are presented in the following Table.

|                                                                                                              | Donor (i)              | Occupancy | Acceptor (i)       | $E(2)^a$<br>kcal/mol | $E(j) - E(i)^b$<br>(a.u.) | $F(i,j)^c$<br>(a.u.) |
|--------------------------------------------------------------------------------------------------------------|------------------------|-----------|--------------------|----------------------|---------------------------|----------------------|
| 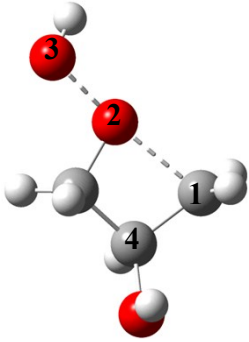 <p>TS <math>R_4</math></p> | $\alpha$ spin orbitals |           |                    |                      |                           |                      |
|                                                                                                              | BD ( $C_1 - O_2$ )     | 0.9741    | BD*( $C_1 - O_2$ ) | 6.7                  | 0.21                      | 0.054                |
|                                                                                                              | LP ( $O_2$ )           | 0.9959    | BD*( $C_1 - O_2$ ) | 6.7                  | 0.67                      | 0.097                |
|                                                                                                              | LP ( $O_3$ )           | 0.7491    | BD*( $C_1 - O_2$ ) | 82.6                 | 0.22                      | 0.171                |
|                                                                                                              | $\beta$ spin orbitals  |           |                    |                      |                           |                      |
|                                                                                                              | LP ( $O_2$ )           | 0.9302    | LP*( $C_1$ )       | 17.9                 | 0.53                      | 0.126                |



|                                                                                                           |                                                            |                |                                                                                                                                                                                                                                                       |            |             |              |
|-----------------------------------------------------------------------------------------------------------|------------------------------------------------------------|----------------|-------------------------------------------------------------------------------------------------------------------------------------------------------------------------------------------------------------------------------------------------------|------------|-------------|--------------|
| 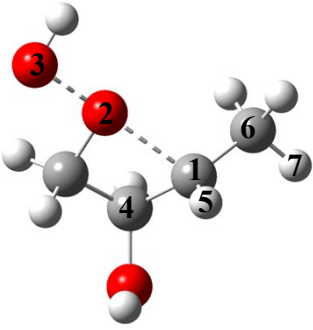 <p>TS R<sub>7</sub></p> | $\alpha$ spin orbitals                                     |                |                                                                                                                                                                                                                                                       |            |             |              |
|                                                                                                           | BD (C <sub>1</sub> - O <sub>2</sub> )                      | 0.9578         | BD*(C <sub>1</sub> - O <sub>2</sub> )                                                                                                                                                                                                                 | 6.9        | 0.20        | 0.052        |
|                                                                                                           | LP (O <sub>2</sub> )                                       | 0.9957         | BD*(C <sub>1</sub> - O <sub>2</sub> )                                                                                                                                                                                                                 | 6.6        | 0.67        | 0.096        |
|                                                                                                           | LP (O <sub>3</sub> )                                       | 0.7527         | BD*(C <sub>1</sub> - O <sub>2</sub> )                                                                                                                                                                                                                 | 80.2       | 0.22        | 0.167        |
|                                                                                                           | Sum of all C-H $\sigma$ bonds involved in the methyl group | /              | <b>BD*(C<sub>1</sub>-O<sub>2</sub>)</b> <span style="color: blue;">- - - - -&gt;</span><br>BD*(C <sub>1</sub> -C <sub>4</sub> ) <span style="color: blue;">2.9</span><br>BD*(C <sub>1</sub> -H <sub>5</sub> ) <span style="color: blue;">} 6.7</span> |            | /           | /            |
|                                                                                                           | $\beta$ spin orbitals                                      |                |                                                                                                                                                                                                                                                       |            |             |              |
|                                                                                                           | LP (O <sub>2</sub> )                                       | 0.94328        | LP*(C <sub>1</sub> )                                                                                                                                                                                                                                  | 14.6       | 0.54        | 0.116        |
|                                                                                                           | <b>BD (C<sub>6</sub> - H<sub>7</sub>)</b>                  | <b>0.96651</b> | <b>BD*(C<sub>1</sub>-C<sub>4</sub>)</b>                                                                                                                                                                                                               | <b>7.5</b> | <b>0.45</b> | <b>0.077</b> |
|                                                                                                           | Sum of all C-H $\sigma$ bonds involved in the methyl group | /              | LP*(C <sub>1</sub> )<br>BD*(C <sub>1</sub> -C <sub>4</sub> )<br>BD*(C <sub>1</sub> -H <sub>5</sub> ) <span style="color: blue;">} 12.8</span>                                                                                                         |            | /           | /            |

|                                                                                                            |                                                             |        |                                                                                                                                                              |             |             |              |
|------------------------------------------------------------------------------------------------------------|-------------------------------------------------------------|--------|--------------------------------------------------------------------------------------------------------------------------------------------------------------|-------------|-------------|--------------|
| 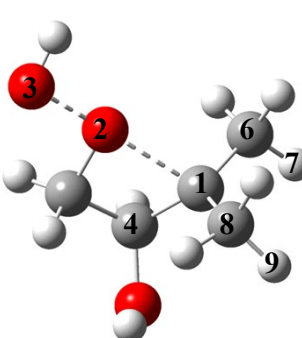 <p>TS R<sub>10</sub></p> | $\alpha$ spin orbitals                                      |        |                                                                                                                                                              |             |             |              |
|                                                                                                            | BD (C <sub>1</sub> - O <sub>2</sub> )                       | 0.9433 | BD*(C <sub>1</sub> - O <sub>2</sub> )                                                                                                                        | 7.6         | 0.19        | 0.053        |
|                                                                                                            | LP (O <sub>2</sub> )                                        | 0.9950 | BD*(C <sub>1</sub> - O <sub>2</sub> )                                                                                                                        | 6.8         | 0.66        | 0.098        |
|                                                                                                            | LP (O <sub>3</sub> )                                        | 0.7464 | BD <sub>1</sub> *(C <sub>1</sub> - O <sub>2</sub> )                                                                                                          | 81.3        | 0.21        | 0.167        |
|                                                                                                            | Sum of all C-H $\sigma$ bonds involved in the methyl groups | /      | BD*(C <sub>1</sub> -O <sub>2</sub> )<br>BD*(C <sub>1</sub> -C <sub>4</sub> )<br>BD*(C <sub>1</sub> -C <sub>6</sub> )<br>BD*(C <sub>1</sub> -C <sub>8</sub> ) | 6.0<br>16.1 | /           | /            |
|                                                                                                            | $\beta$ spin orbitals                                       |        |                                                                                                                                                              |             |             |              |
|                                                                                                            | LP (O <sub>2</sub> )                                        | 0.9508 | LP*(C <sub>1</sub> )                                                                                                                                         | 13.2        | 0.56        | 0.114        |
|                                                                                                            | <b>BD (C<sub>6</sub> - H<sub>7</sub>)</b>                   | 0.9675 | <b>LP*(C<sub>1</sub>)</b>                                                                                                                                    | <b>7.7</b>  | <b>0.45</b> | <b>0.079</b> |
|                                                                                                            | <b>BD (C<sub>8</sub> - H<sub>9</sub>)</b>                   | 0.9711 | <b>LP*(C<sub>1</sub>)</b>                                                                                                                                    | <b>6.9</b>  | <b>0.45</b> | <b>0.076</b> |
|                                                                                                            | Sum of all C-H $\sigma$ bonds involved in the methyl groups | /      | LP*(C <sub>1</sub> )<br>BD*(C <sub>1</sub> -C <sub>4</sub> )<br>BD*(C <sub>1</sub> -C <sub>6</sub> )<br>BD*(C <sub>1</sub> -C <sub>8</sub> )                 | 27.7        | /           | /            |
